# Supplementary material
Source: PubMed Central journal article supplement (PMC2861615)
Supplement: E10-01-0078_1.pdf [file E10-01-0078_1.pdf]

## **SUPPLEMENTARY INFORMATION**

### **Abbreviations:**

snoRNA: small nucleolar RNA

snRNA: small nuclear RNA

snRNP: small nuclear ribonucleoprotein

rRNA: ribosomal RNA

tRNA: transfer RNA

miRNA: micro RNA

MEGF8: multiple epidermal growth factor-like-domains 8

SMARCA4: SWI/SNF related, matrix associated, actin dependent regulator of chromatin, subfamily a, member 4

MAD1L1: MAD1 mitotic arrest deficient-like 1

GRIK5: glutamate receptor, ionotropic, kainate 5

HIPPI: huntington-interacting protein protein interactor

FGFR3: fibroblast growth factor receptor 3

mRNA: messenger RNA

pre-mRNA: precursor messenger RNA

GAPDH: glyceraldehyde phosphate dehydrogenase

HBII-180: human brain snoRNA II - 180

MBII: mouse brain snoRNA II

PCR: polymerase chain reaction

CMV: cytomegalovirus

HDAC: histone deacetylase 1

HSP70: heat shock protein 70

CBP: CREB binding protein isoform a

HPRT: hypoxanthine phosphoribosyltransferase 1

PSP-1: paraspeckle protein 1

## LEGENDS TO SUPPLEMENTARY FIGURES

**Supplementary Figure 1. Characterization of HBII-180C and chimera snoRNAs.** (a) Fluorescence In Situ Hybridisation showing nucleolar localization of wild type HBII-180C and chimera snoRNAs (Cy3, Red). Fibrillarin localisation pattern is also shown on the right panel (FITC, green). DNA is stained by DAPI (Blue). Scale Bar is 10  $\mu$ m. (b) Characterization of HBII-180C and chimera snoRNAs. RNA blot showing sub cellular distribution of HBII-180C and Chimera snoRNAs. The same amount of HeLa cell total RNA (lanes 1), cytoplasmic RNA (lanes 2), nucleoplasmic RNA (lanes 3) and nucleolar RNA (lanes 4) were compared with either transiently transfected wild type or chimera snoRNA expression mini-genes by northern RNA blotting analysis using specific probes. Fractionation quality was tested using the tRNA specific probe (lower panel).

**Supplementary Figure 2. Analysis for HBII-180 snoRNAs M box.** (a) Potential mRNA targets of HBII-180 snoRNAs. Two predicted complementary target gene sequences with highest complementarity are shown for each snoRNA (MEGF8: multiple epidermal growth factor-like-domains 8, SMARCA4: SWI/SNF related, matrix associated, actin dependent regulator of chromatin, subfamily a, member 4, MAD1L1: MAD1 mitotic arrest deficient-like 1, GRIK5: glutamate receptor, ionotropic, kainate 5, HIPPI: huntington-interacting protein protein interactor, FGFR3: fibroblast growth factor receptor 3). (b) Another example of gene knock-down using M box-modified snoRNAs. This is the same experiment as shown in Figure 3b, except the stable cell line was HeLa<sup>GFP-SMN</sup>. pmCherry-HBII-180C is another negative control vector, which has the wild type HBII-180C snoRNA sequence downstream of mCherry cDNA. Scale bar is 10  $\mu$ m. The arrows indicate transfected cells and arrowheads show untransfected

cells. Note clear reduction in GFP expression specifically in the cells transfected with the expression plasmids encoding either HBII-180C chimera1 or 2.

**Supplementary Figure 3. Western blot analysis for chimera snoRNAs knockdown.**

Detection of protein levels for G/YFP following transfection of HeLa<sup>GFP</sup> and HeLa<sup>YFP-Fibrillarin</sup> stable cell lines using either wild type HBII-180C with mCherry expression plasmid pmCherry-HBII-180C (control), expression plasmid pHBII-180C chimera1 (Chimera-1) or expression plasmid pHBII-180C chimera2 (Chimera-2). An equivalent amount of HeLa extract was loaded for each lane and the proteins separated by SDS PAGE, electroblotted and probed both with a monoclonal anti-GFP antibody and with anti-tubulin as a loading control. Transfection efficiency was also calculated by counting the number of mCherry positive cells in 100 randomly selected cells (TF efficiency). The graphs show average signal intensity and standard deviation for three independent experiments. G/YFP signal ratio was normalized to the tubulin signal.

**Supplementary Figure 4. Analysis of off target effects.** Quantitative RT-PCR was performed for 10 different genes to check possible off target effects of Chimera snoMEN vectors. The graph shows average signal intensity and standard deviation for three independent experiments. Each signal was normalised by U3 snoRNA intensity. Left panel shows semi-quantitative PCR results. Each primer set specificity was also made sure by semi-quantitative PCR as a single band. Abbreviation is available in Supplementary information.

**Supplementary Figure 5. Analysis of HBII-180C and chimera snoRNA mutations.** Mutant plasmids (CM2m2-1, m2-2 & m3) were transiently transfected into a stable cell line expressing

the GFP-SMN fusion protein (HeLa<sup>GFP-SMN</sup>). Scale bar is 15  $\mu$ m. Arrow: transfected, Arrowhead: untransfected. Note clear knock-down effect of the mutant plasmids that destroyed the 28S rRNA complementary sequence (CMm2-1 & m2-2).

**Supplementary Figure 6. Analysis of HBII-180C and chimera snoRNA mutations.** Mutant plasmids that have either insertions in the M box to increase complementarity to GFP (CM2In-1 to -3), or deletion in the M box (CM2Del-1 to -3), were transiently transfected into the stable cell line expressing GFP-SMN fusion protein (HeLa<sup>GFP-SMN</sup>). Arrow: transfected, Scale bar is 15  $\mu$ m. Arrowhead: untransfected.

**Supplementary Figure 7. Analysis of HBII-180C and chimera snoRNA mutations.** Mutant plasmids that have point mutations in M box (CM2X-1 to -6) were transiently transfected into the stable cell line expressing GFP-SMN fusion protein (HeLa<sup>GFP-SMN</sup>). Scale bar is 15  $\mu$ m. Arrow: transfected, Arrowhead: untransfected.

**Supplementary Figure 8. Dose response analysis comparing GFP suppression level with expression level of snoMEN vectors.** Graph shows the fluorescence signal ratio between mCherry and GFP-SMN (n>10). Chimera2 and CM2-In3 showed a negative correlation between mCherry signal and GFP signal, while, CM2m7 (boxD mutant) and HBII-180C (Control) showed similar GFP levels independent of the mCherry level.

**Supplementary Figure 9. Another example of gene knock-down using triple modified snoRNAs.** This shows the same experiment as in Fig. 7b, except that the stable cell line was HeLa<sup>GFP</sup>. The arrows indicate transfected cells and arrowheads show untransfected cells. Scale

bar is 10  $\mu$ m. Note clear reduction in GFP expression specifically in the cells transfected with the expression plasmid encoding HBII-180C triple chimera.

**Supplementary Figure 10. Western blot analysis for triplet snoMEN knockdown.** (a)

Knock-down efficiency of each chimera plasmid targeted to G/YFP was tested by western blotting (lane 1-5). Detection of protein levels for YFP-Fibrillarin following transfection of HeLa<sup>YFP-Fibrillarin</sup> stable cell lines using either mCherry and wild type HBII-180C expression plasmid pmCherry-HBII-180C (control: lane1), expression plasmid chimera1 (lane2), chimera2 (lane3), chimera3 (lane4), HBII-180C triple chimera (lane5). An equivalent amount of HeLa extract was loaded for each lane and the proteins separated by SDS PAGE, electroblotted onto membrane and probed both with a monoclonal anti-GFP antibody and with anti-B23 as a loading control. Graph shows YFP-Fibrillarin signal intensity ratio normalised using the B23 signal. Transfection efficiency was determined by counting the number of mCherry positive cells in 100 randomly selected cells (TF efficiency). (b) Detection of protein levels for endogenous Coilin and LaminA/C following transfection of HeLa cells using either mCherry triple chimera (Control: lane1) and pCoilin/Lamin-snoMEN (lane2). An equivalent amount of HeLa extract was loaded for each lane and the proteins separated by SDS PAGE, electroblotted and probed both with a monoclonal anti-Coilin and anti-Lamin antibody and with anti-tubulin as a loading control. Graph shows Coilin and Lamin signal intensity normalised to the tubulin signal.

**Supplementary Figure 11. SiRNA oligoribonucleotides targeted to pre-mRNA regions.** (a)

This is the same experiment as in Fig. 13a, except the target gene is Coilin. The same pre-mRNA sequences targeted by the snoMEN vector were targeted by siRNA oligoribonucleotides. Scrambled siRNA (Control siRNA) and Coilin siRNA (Dharmacon) were transfected as a negative and a positive control, respectively. Coilin Mbox siRNA-1 and Coilin Mbox siRNA-2 have the same target sequence with Coilin snoMEN set1 and Coilin snoMEN set2, respectively

(Fig. 14). Scale bar is 5  $\mu$ m. Arrow: cells not showing knock-down, Arrowhead: cells showing knock-down. (b) Western blot analysis for siRNA experiments. Detection of protein levels for endogenous Coilin following transfection of HeLa cells using either Scrambled siRNA (Control: lane1), Coilin siRNA (lane2), Coilin M box siRNA-1 (lane3) and Coilin M box siRNA-2 (lane4). An equivalent amount of HeLa extract was loaded for each lane and the proteins separated by SDS PAGE, electroblotted onto membrane and probed both with a monoclonal anti-Coilin antibody and with anti-tubulin as a loading control. Graph shows Coilin signal intensity normalised to the tubulin signal.

**Fig. 1 (Sup)**

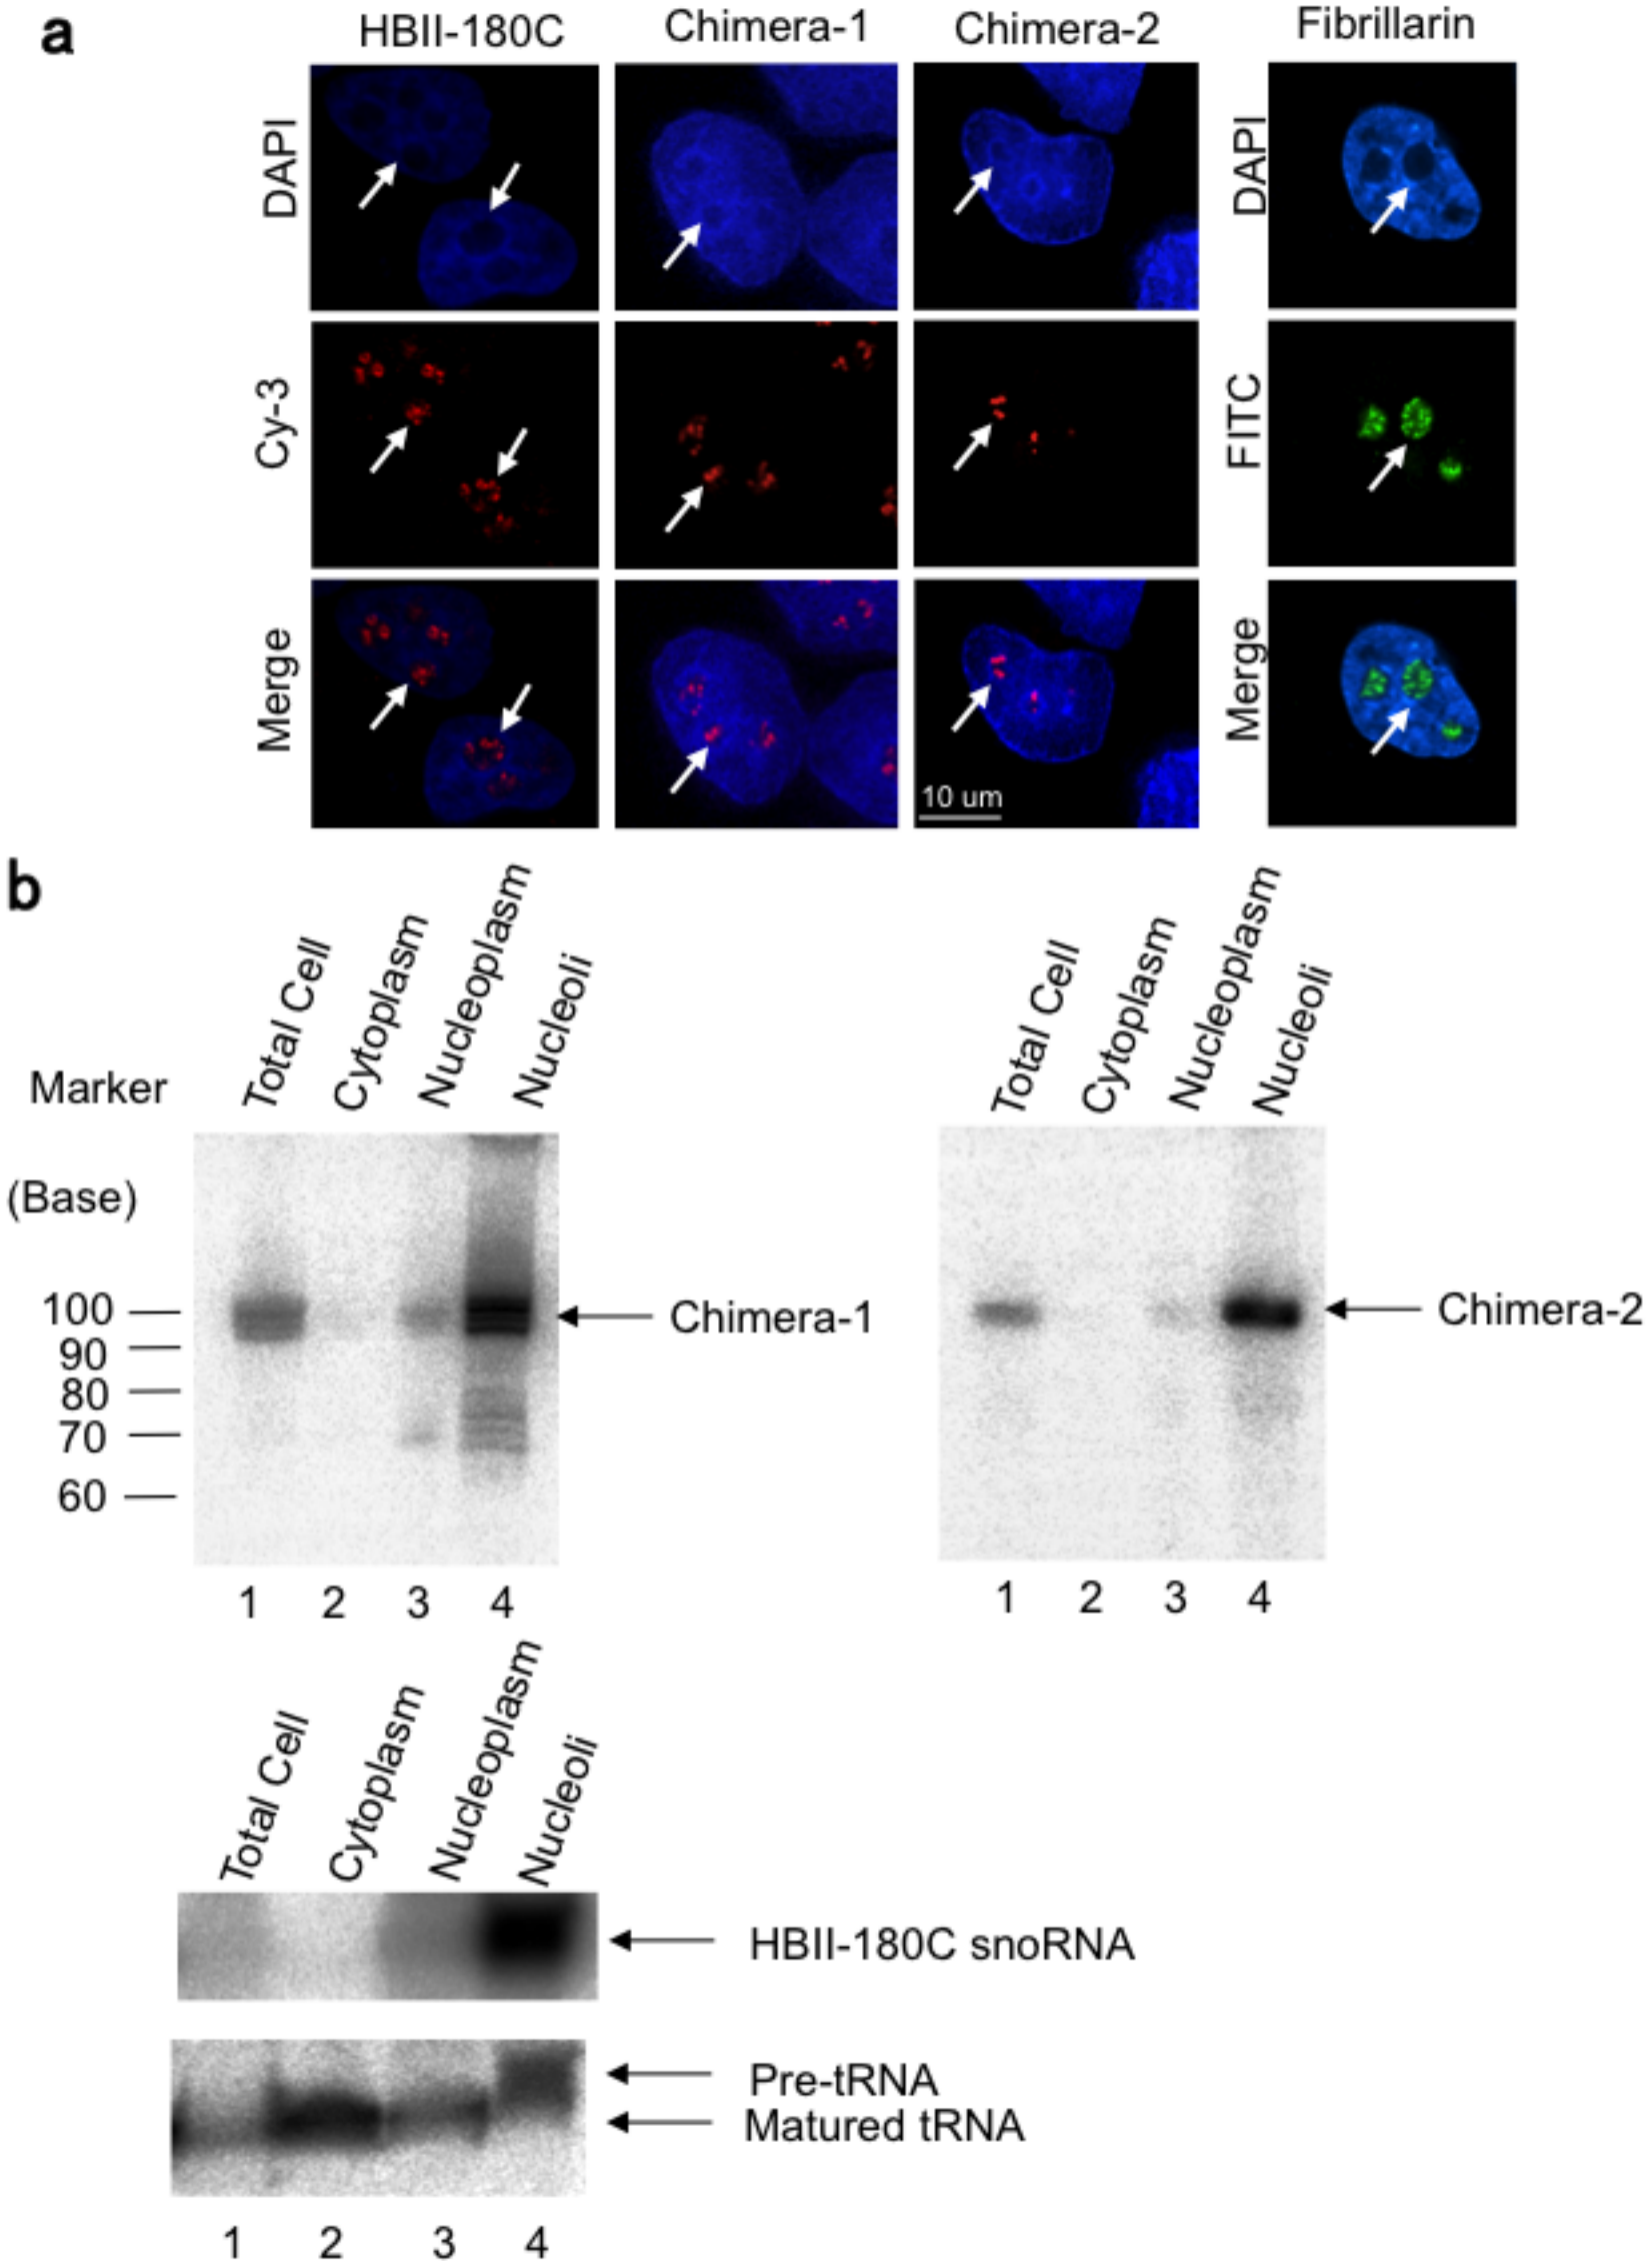

**Fig. 2(Sup)**  
**a**

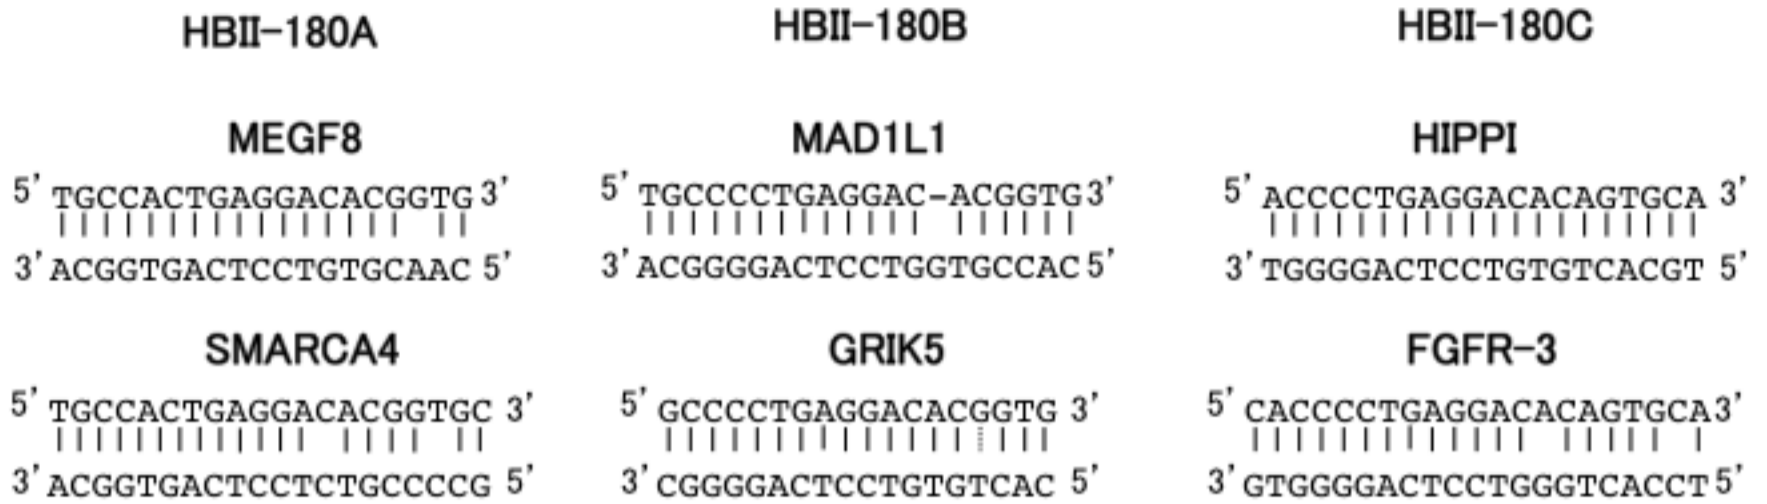

**b**

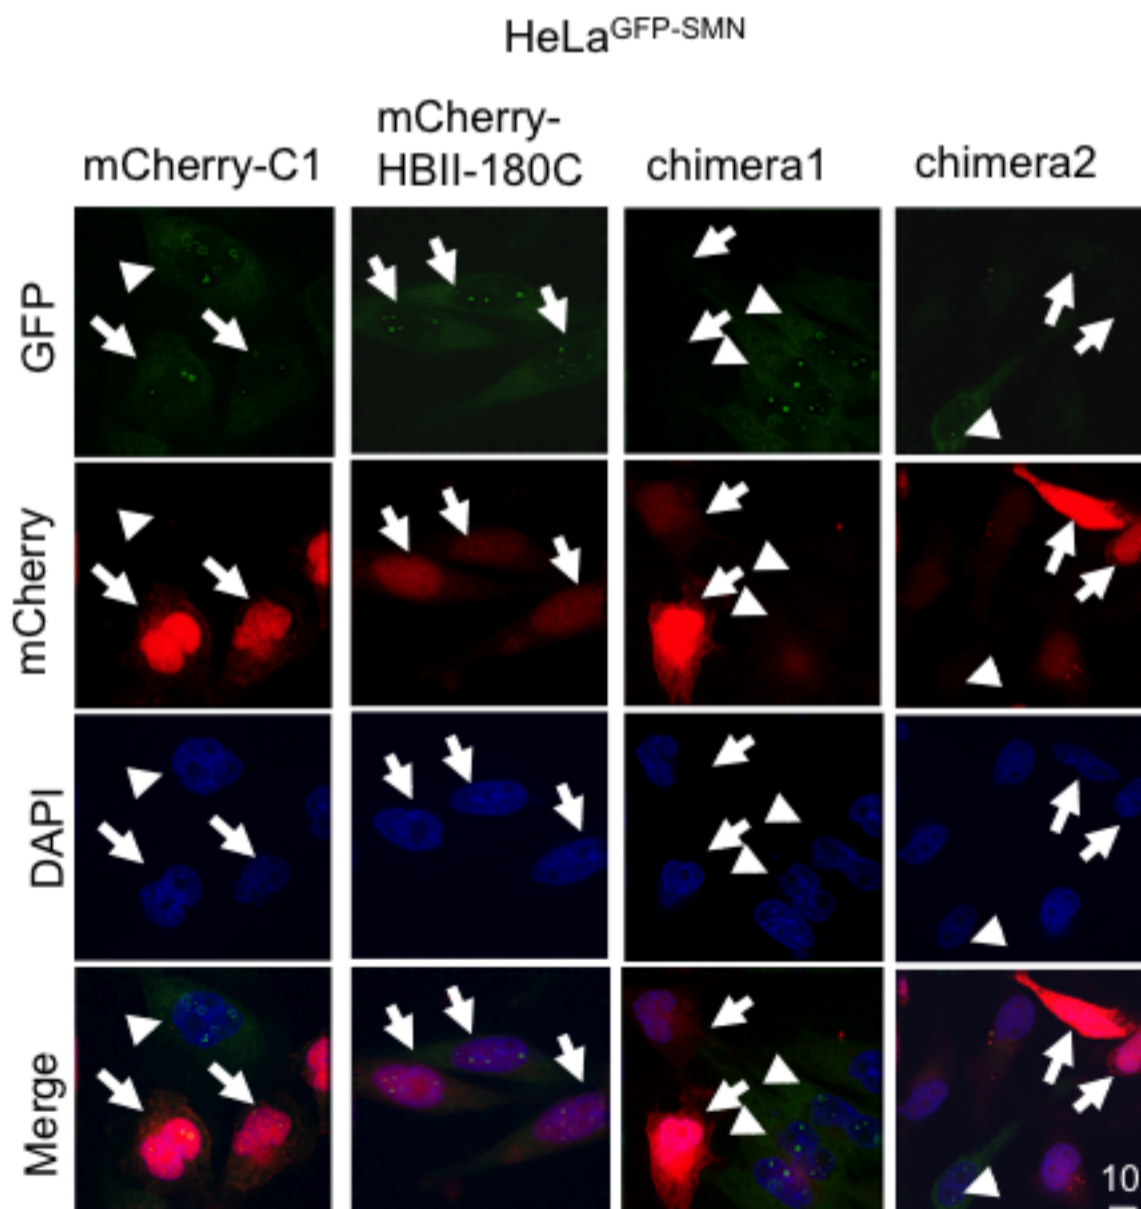



Fig. 3 (Sup)

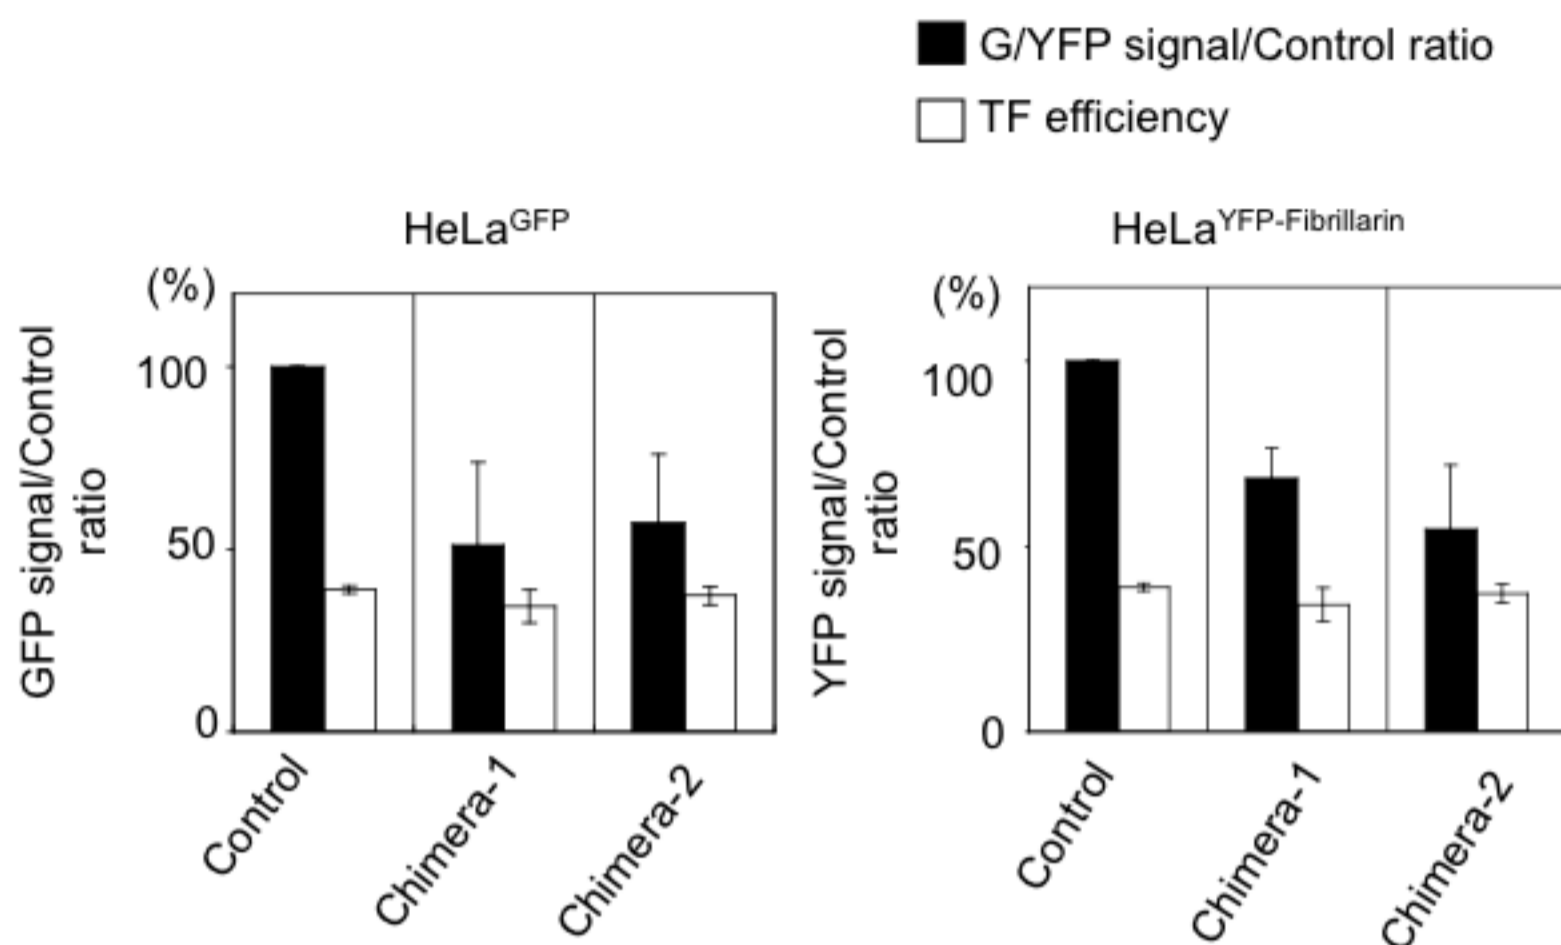

Fig. 4 (sup)

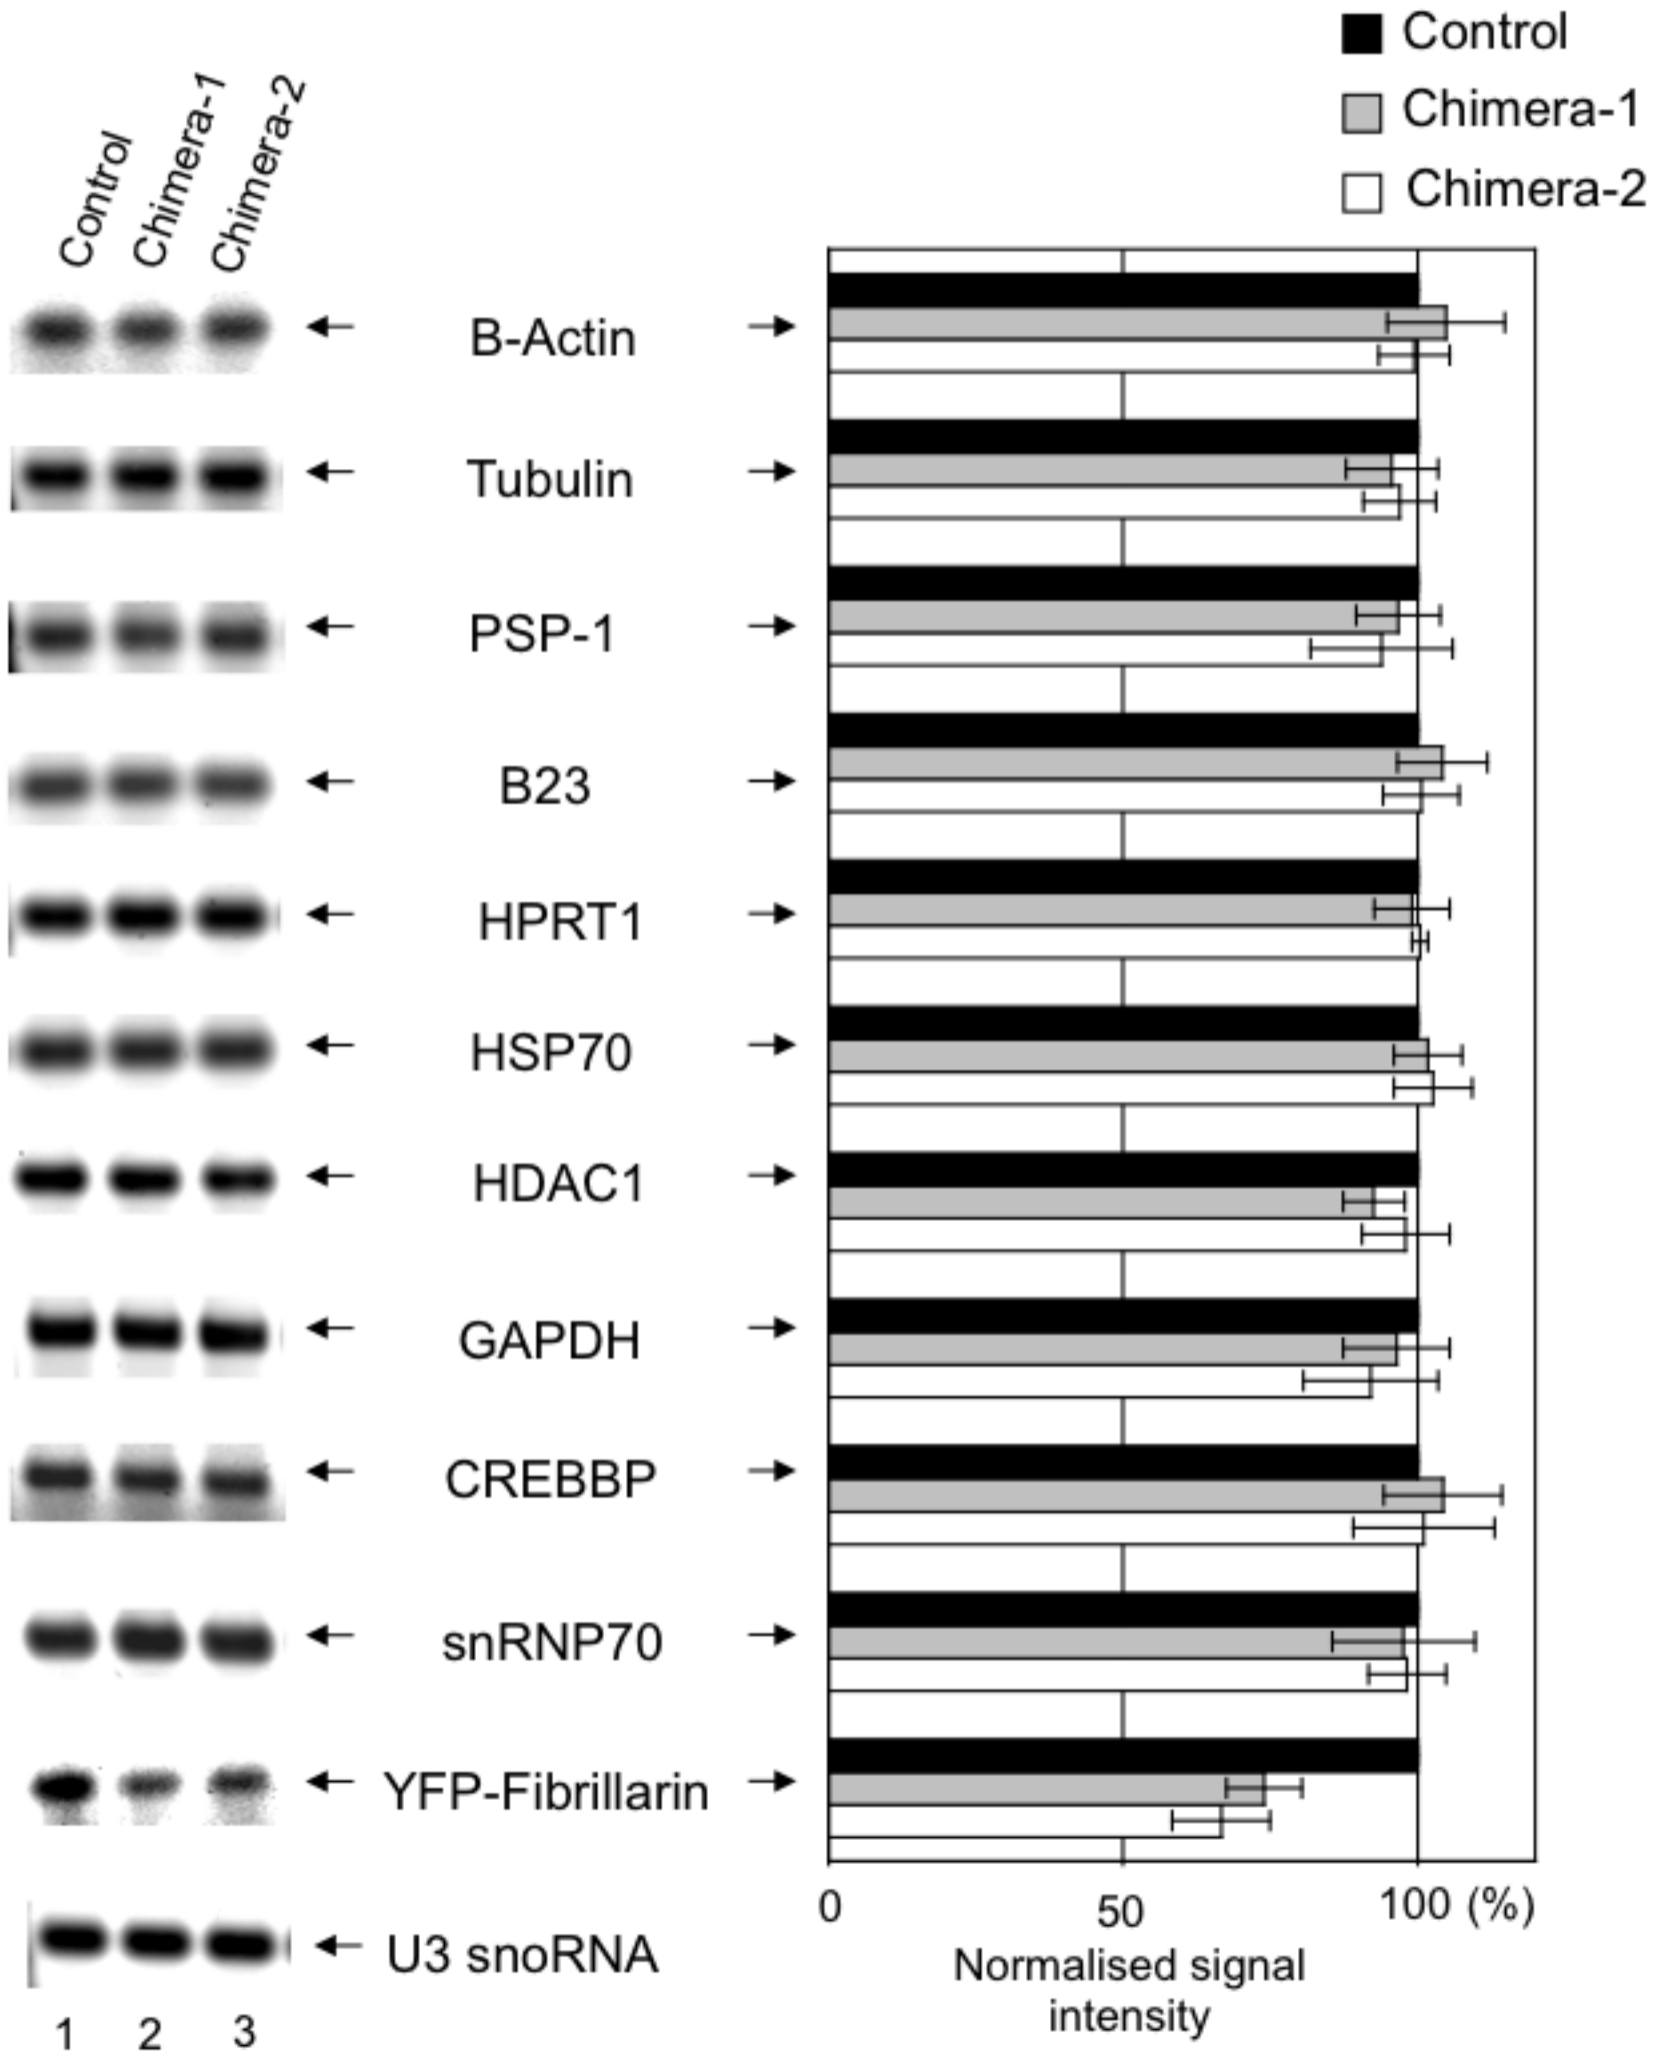

**Fig. 5 (Sup)**

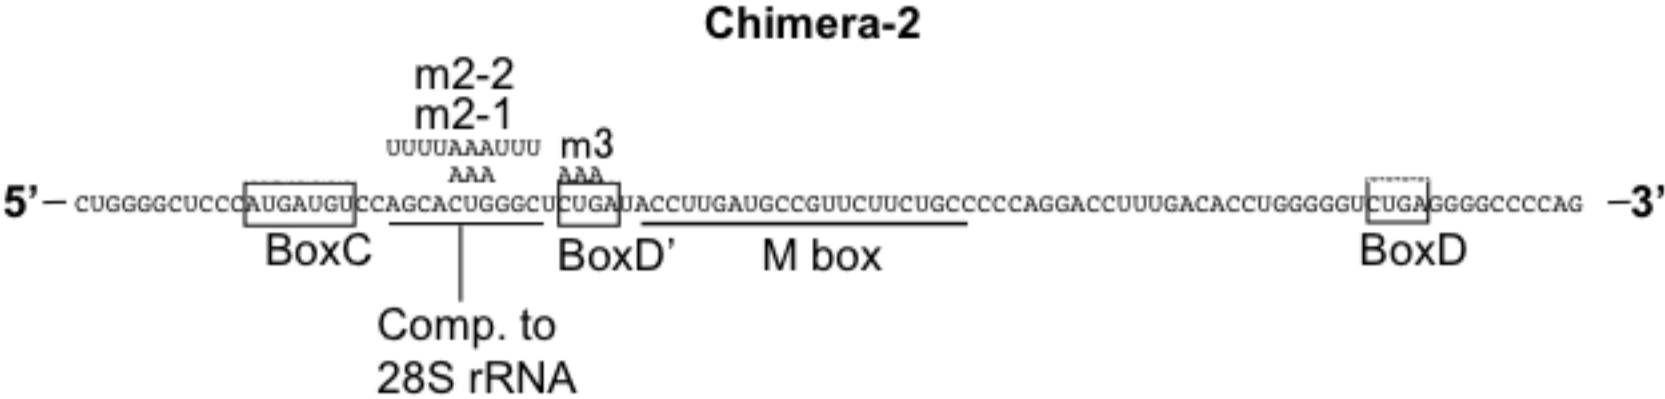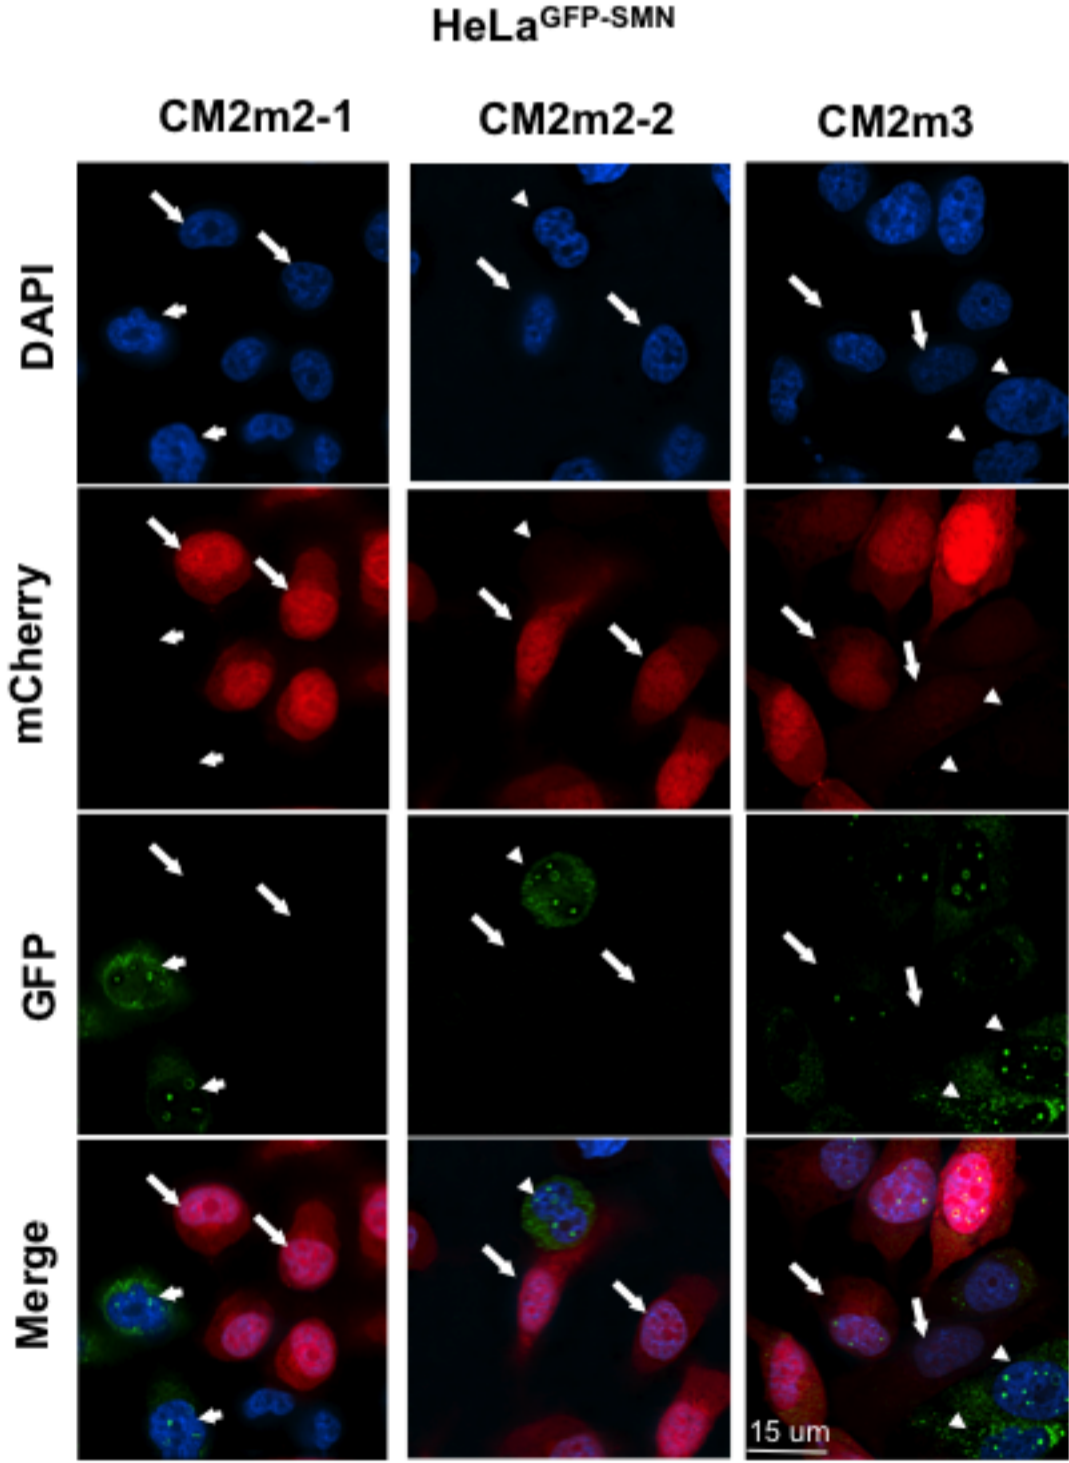

Fig. 6 (sup)

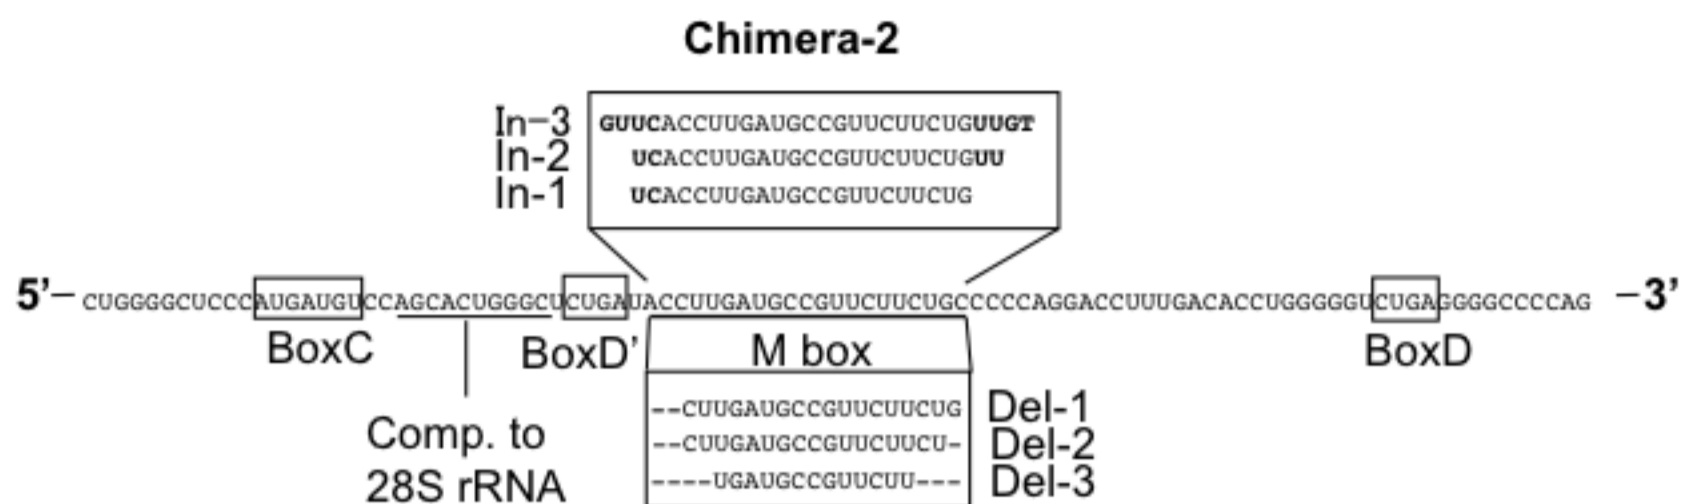

HeLa<sup>GFP-SMN</sup>

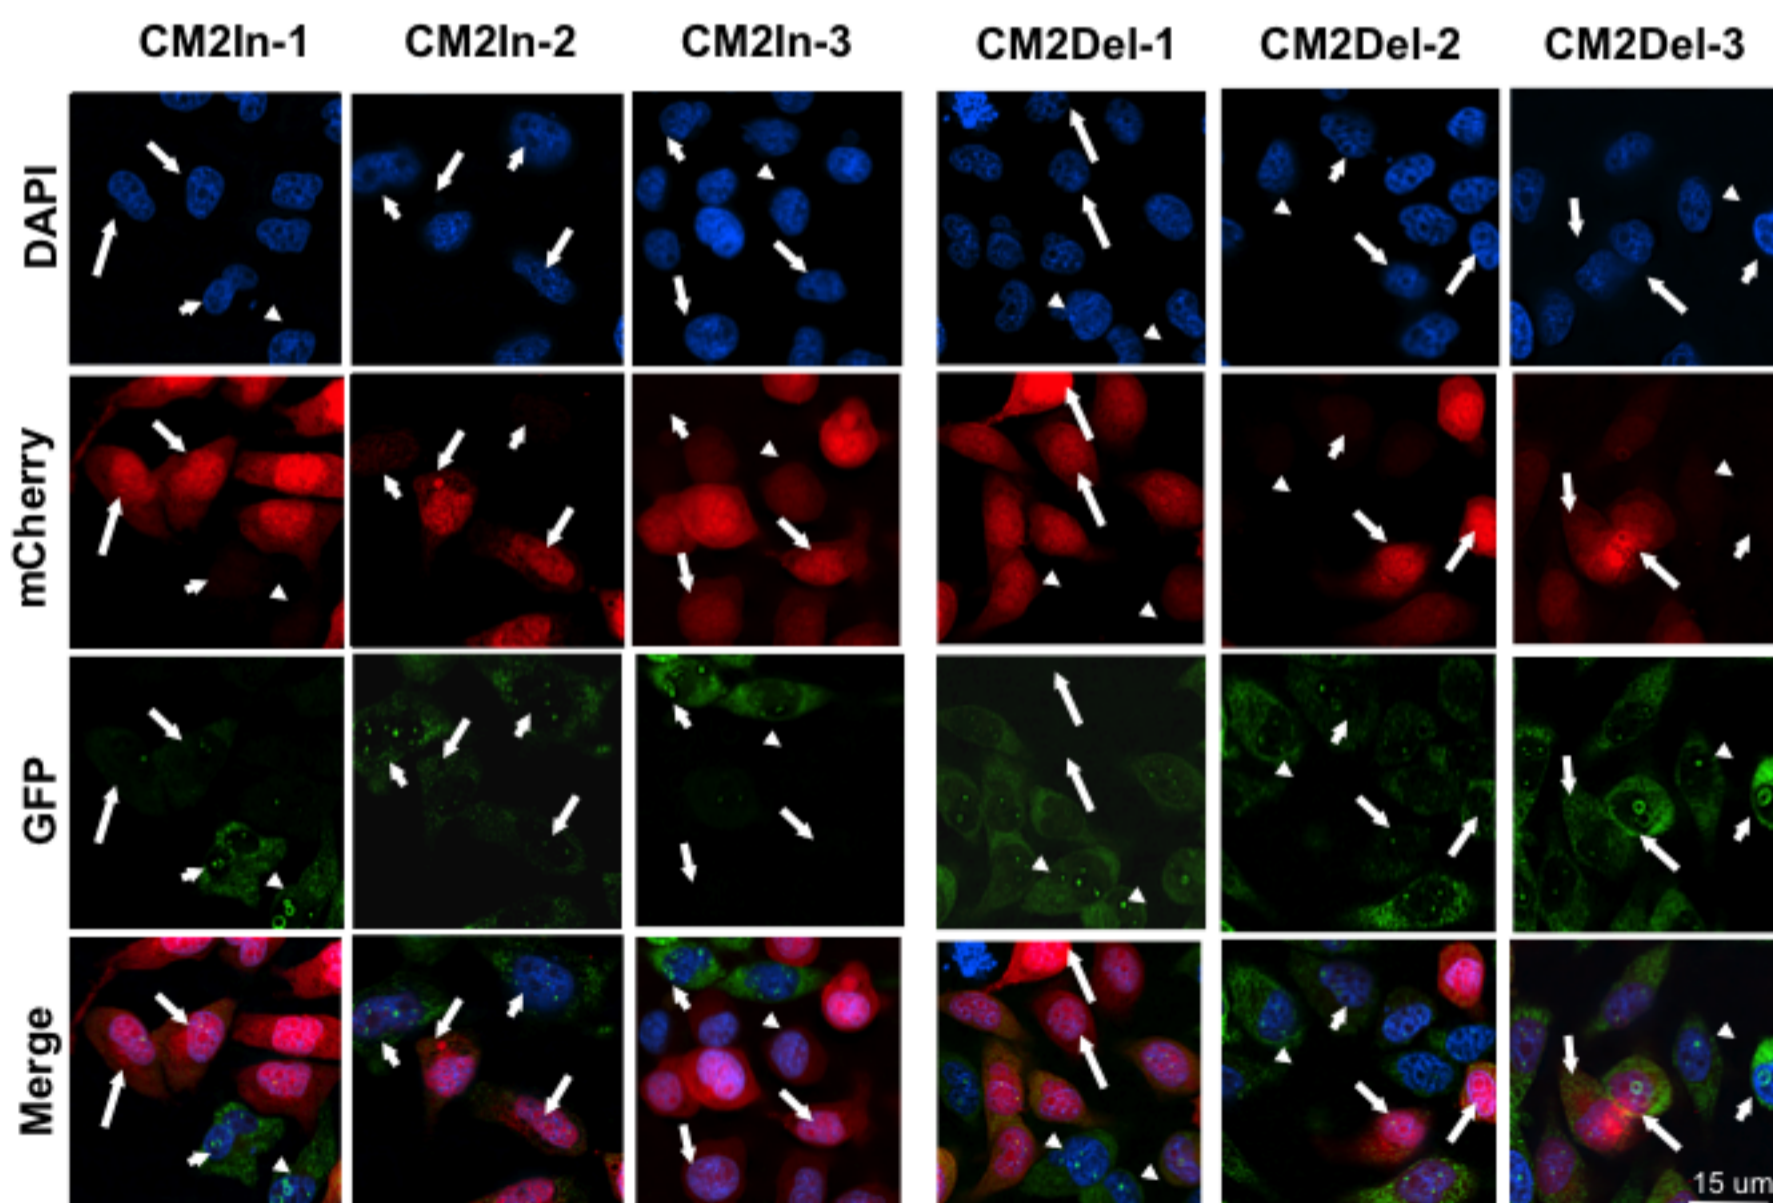

Fig. 7 (sup)

Chimera-2

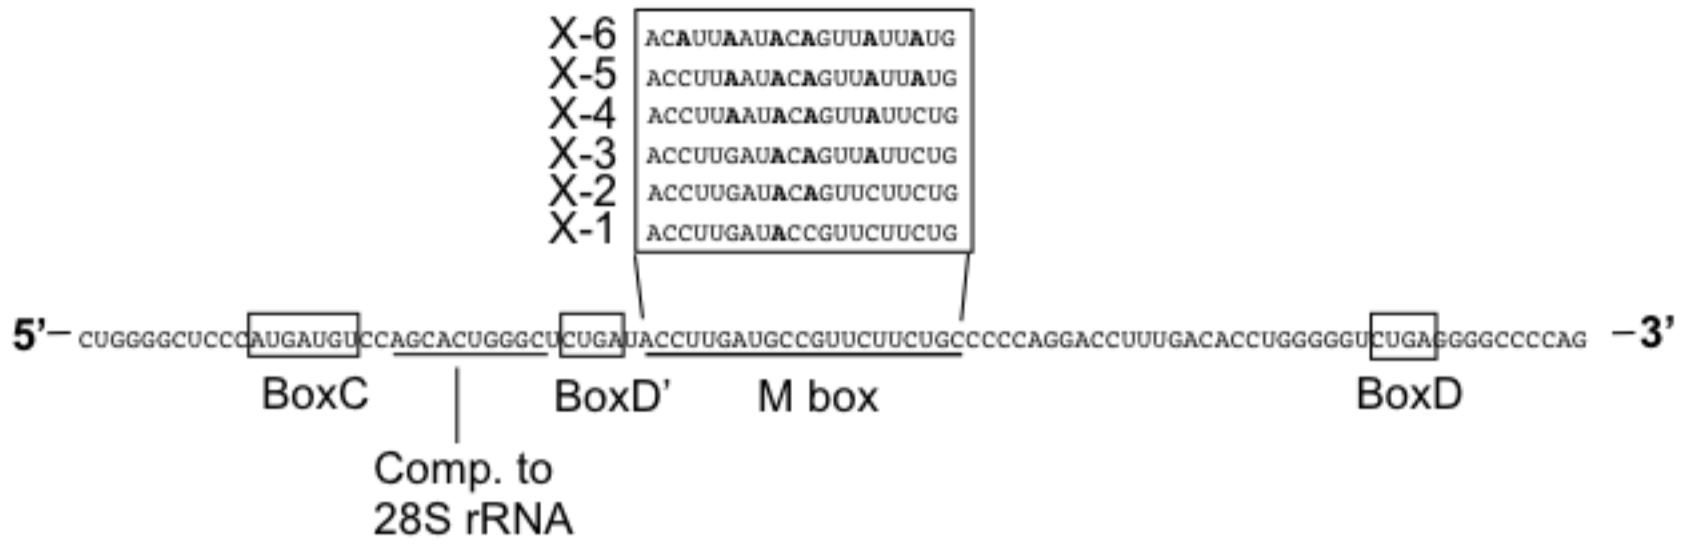

HeLa<sup>GFP-SMN</sup>

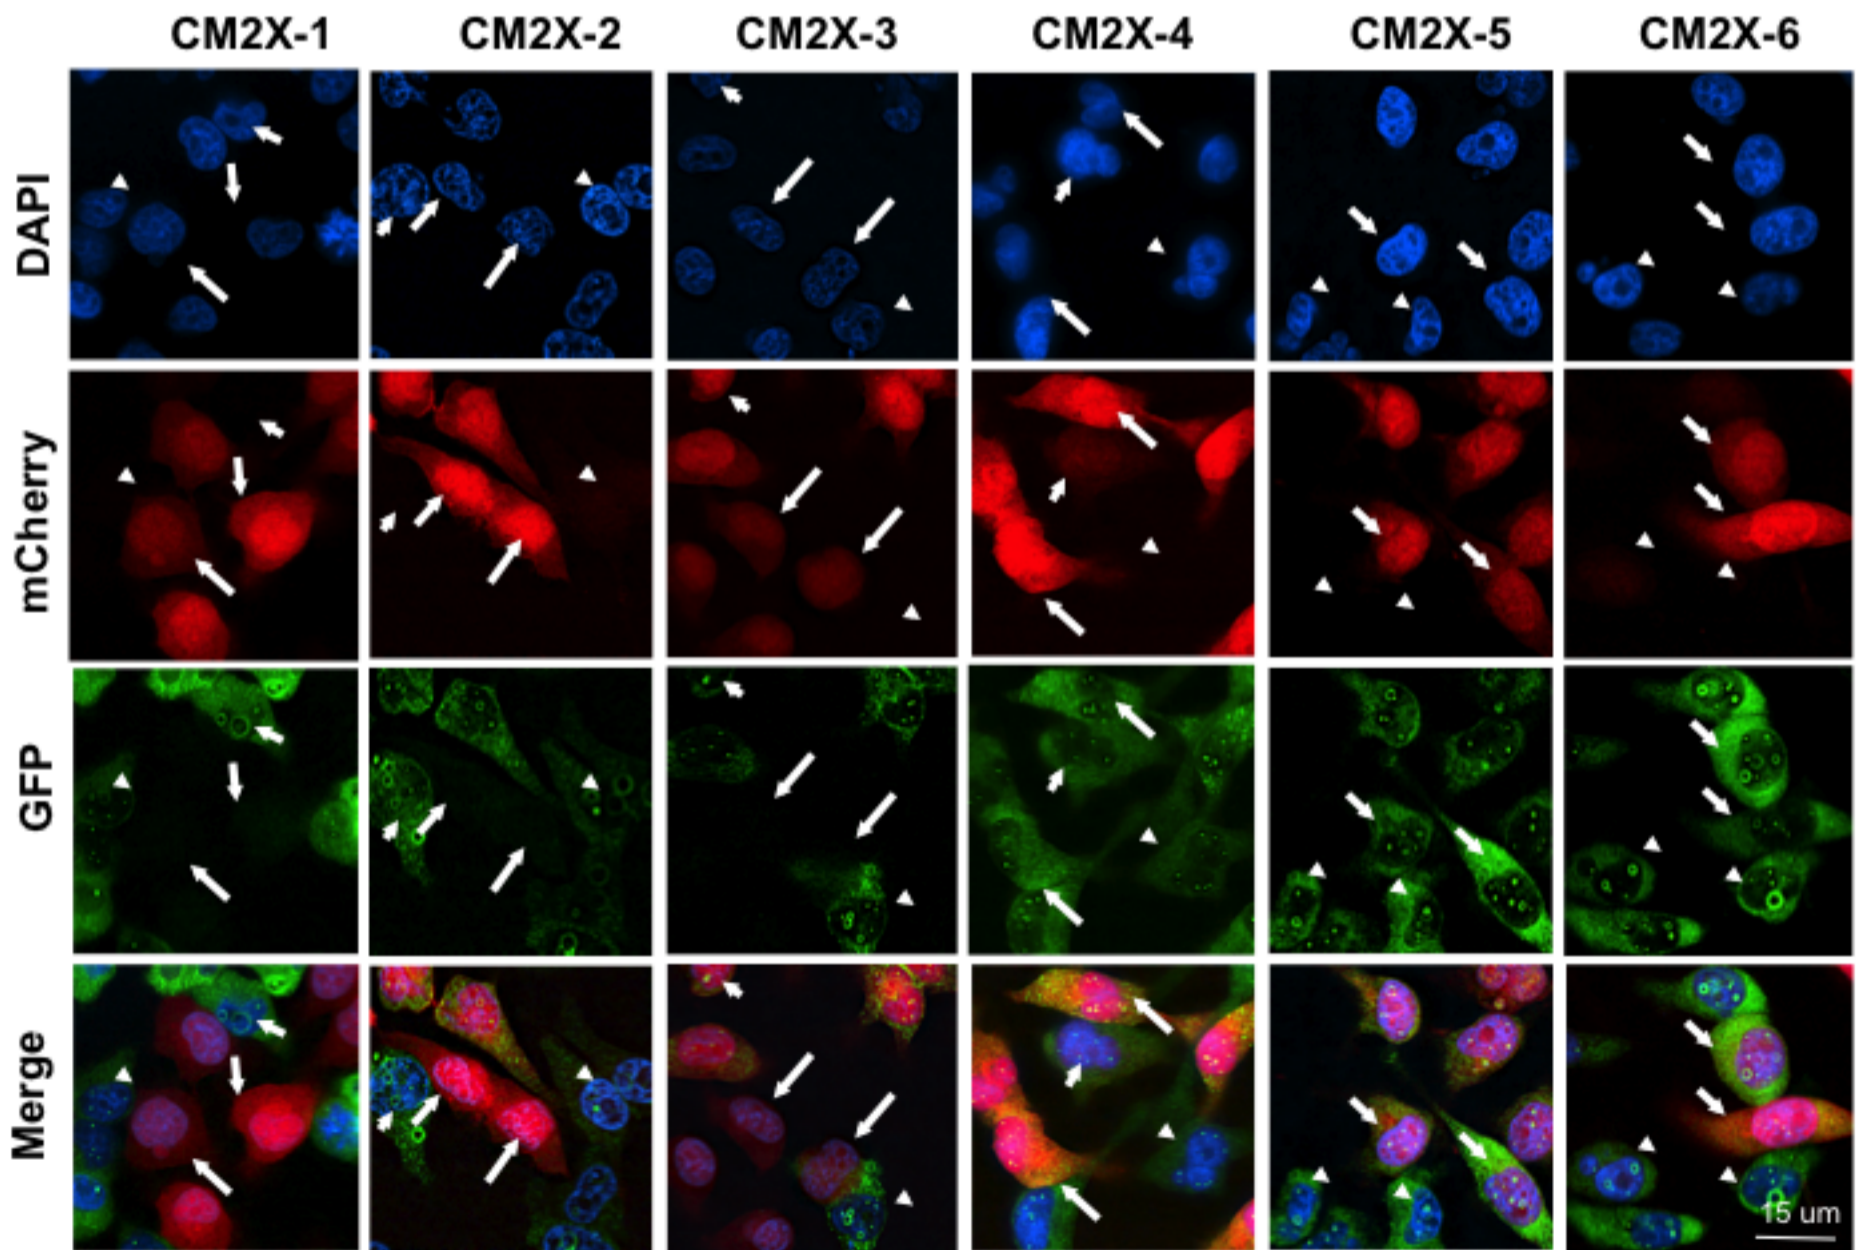

**Fig. 8 (sup)**

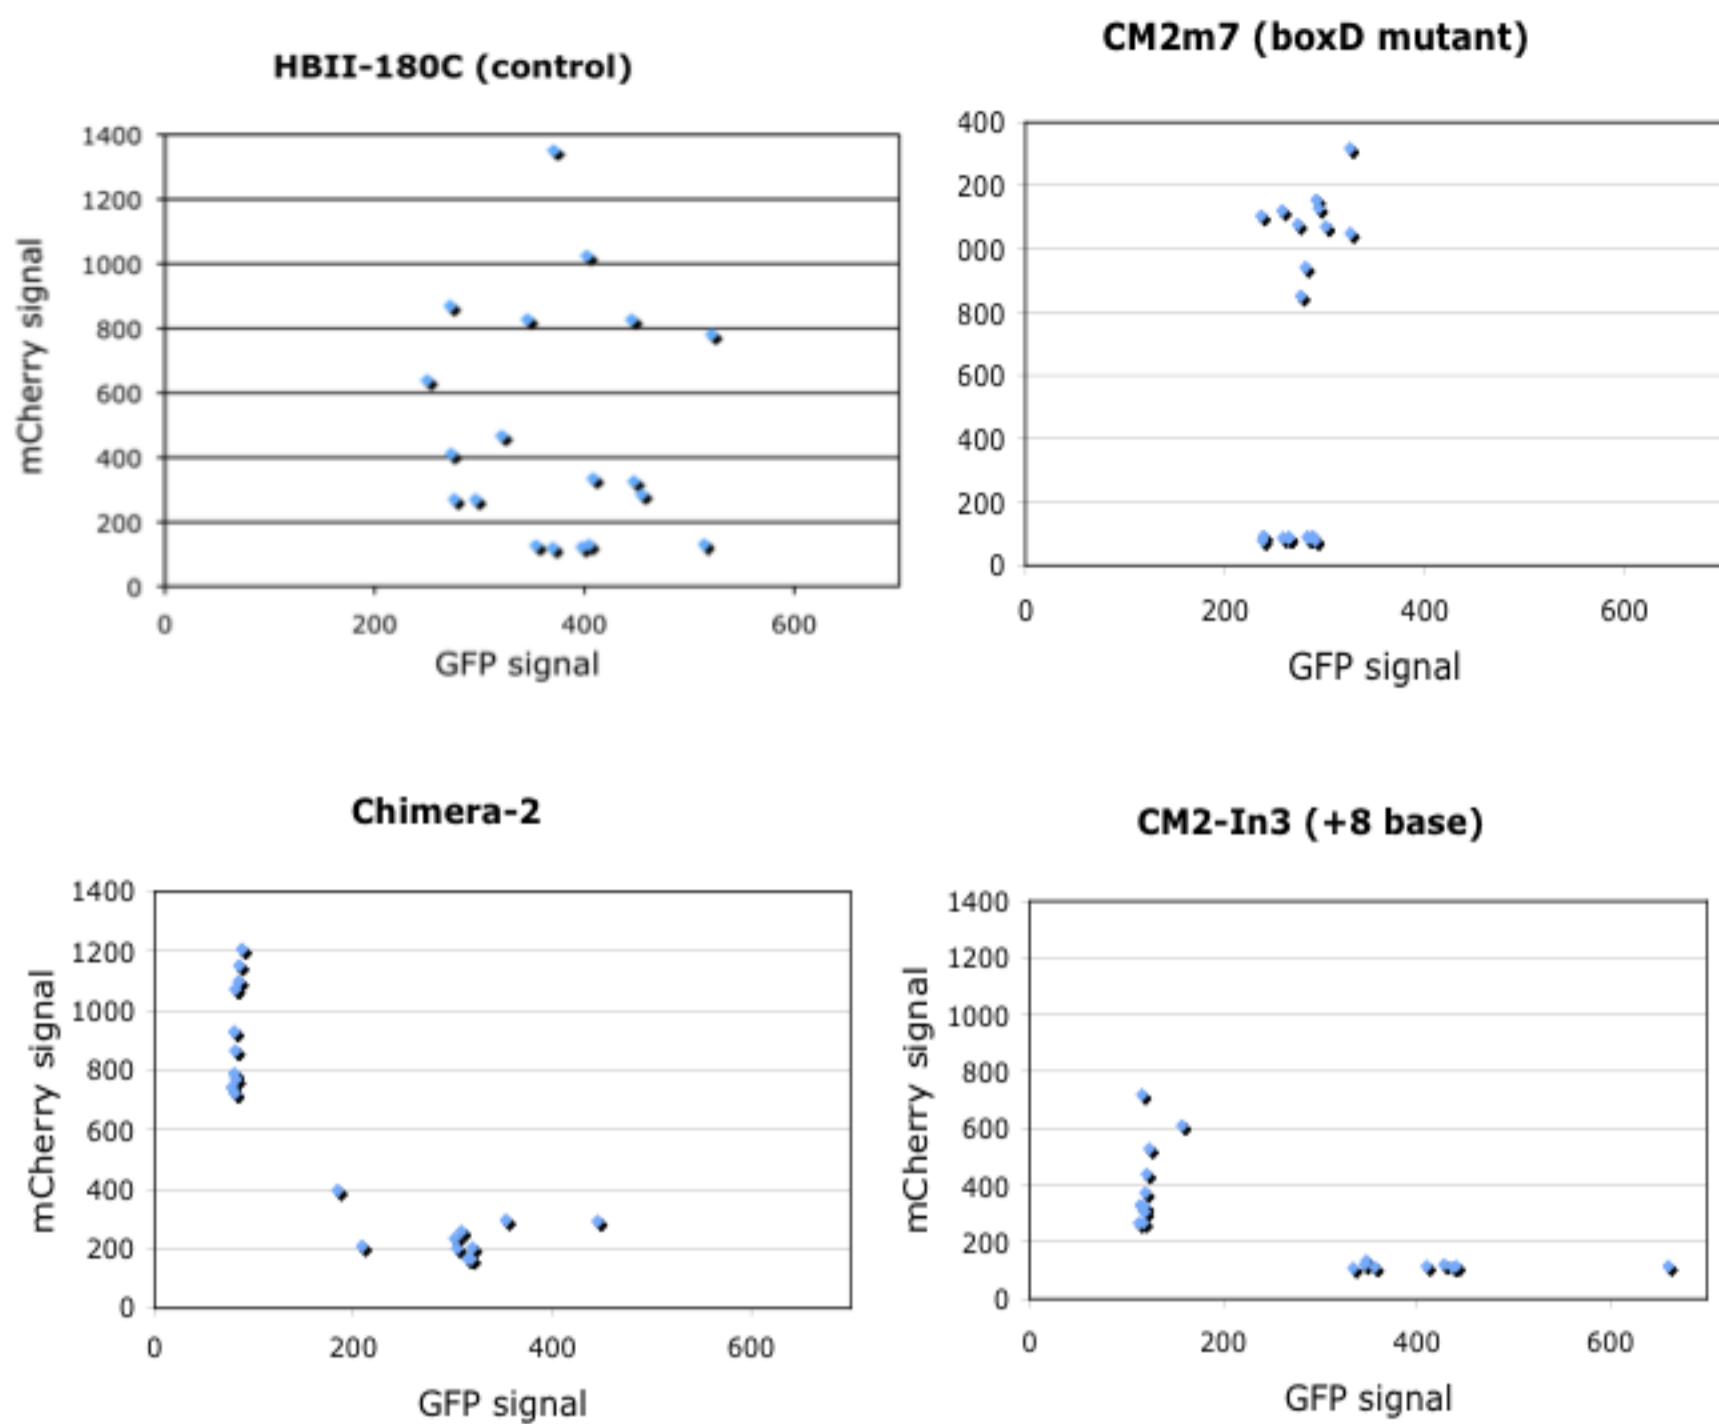

Fig. 9 (sup)

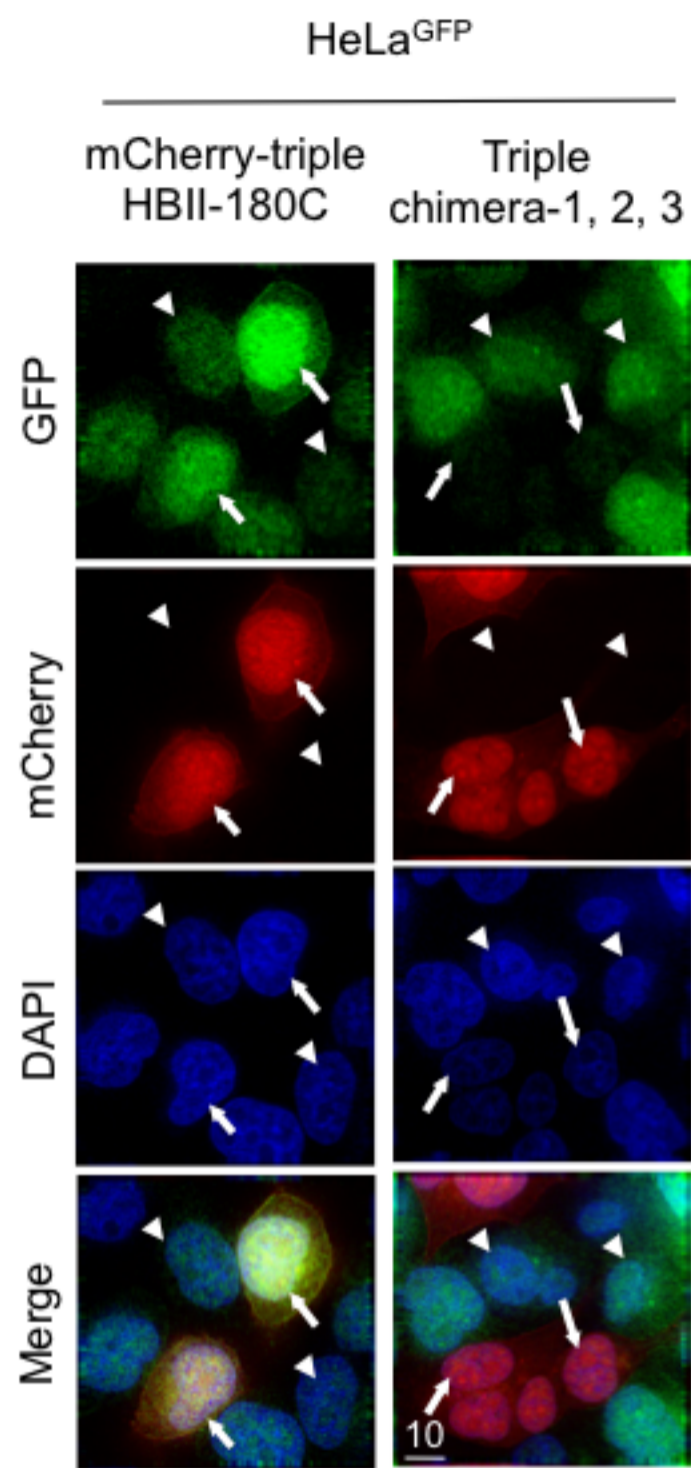

Fig. 10 (Sup)

a

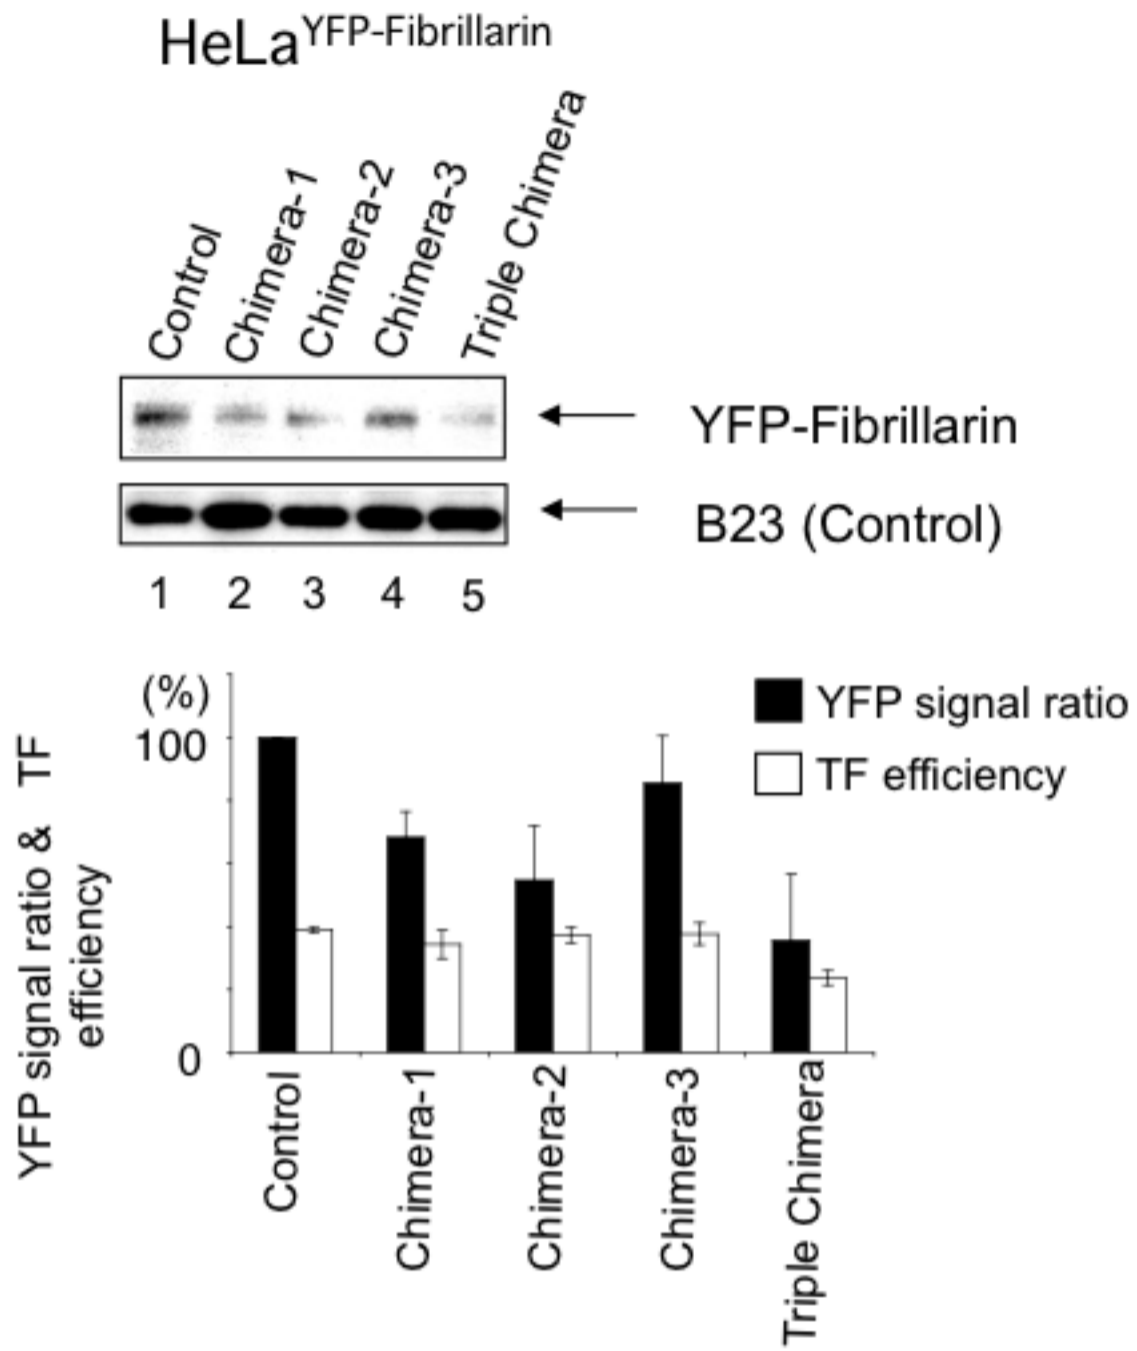

b

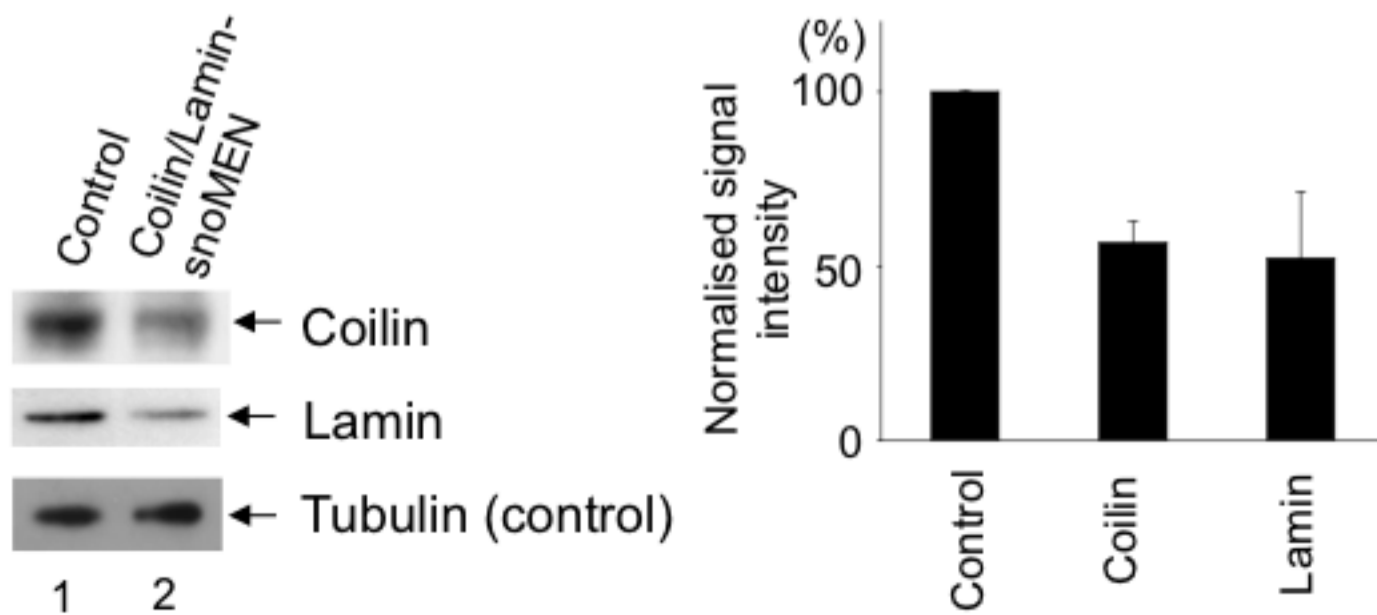



Fig. 11 (Sup)

**a**

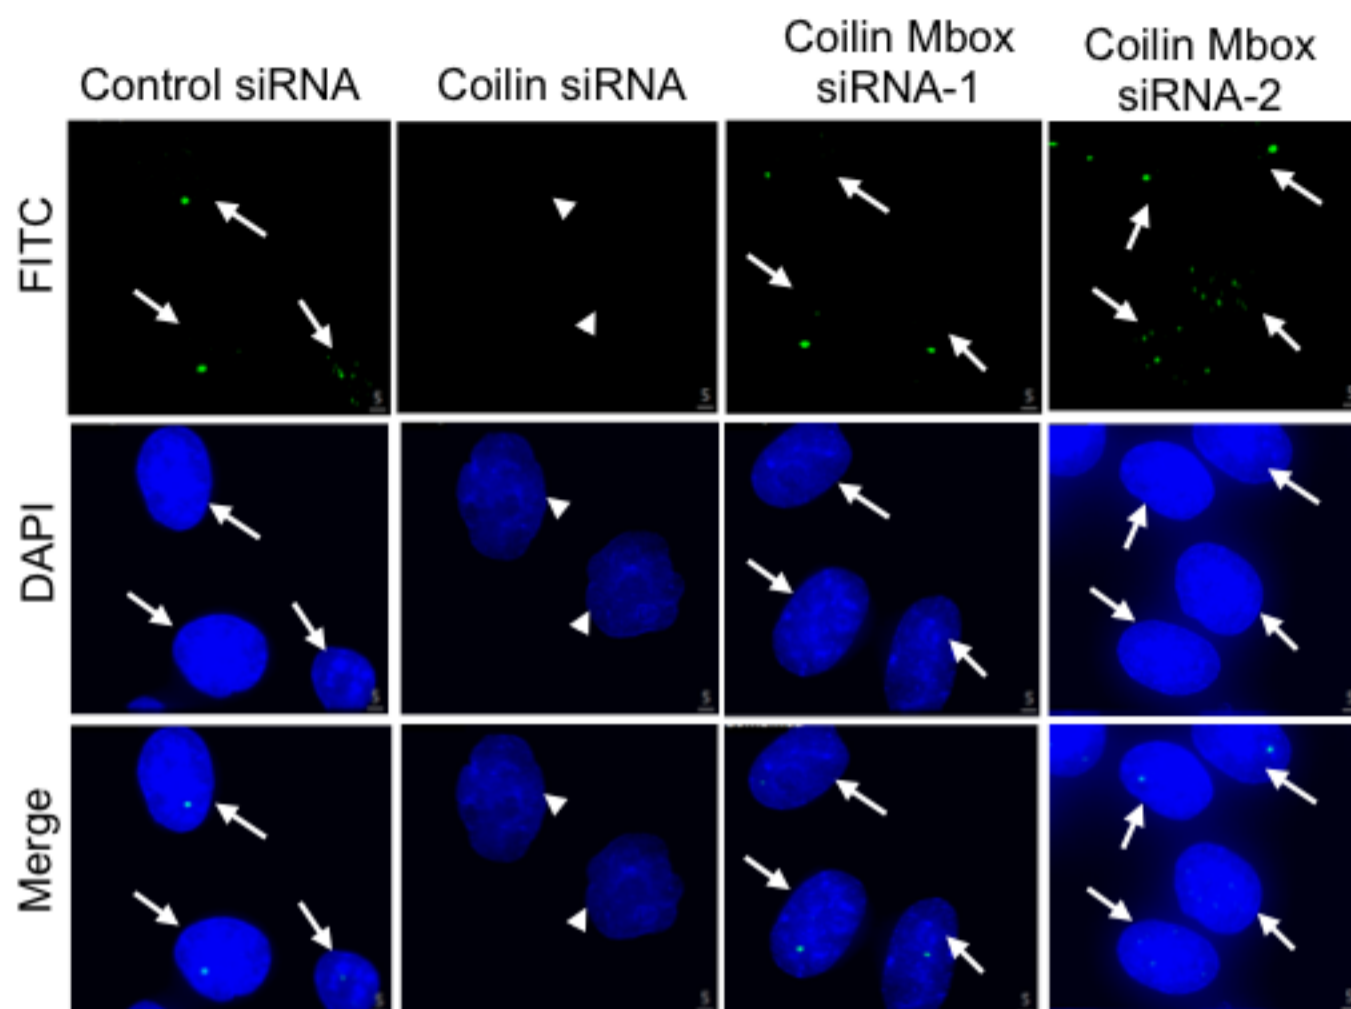

**b**

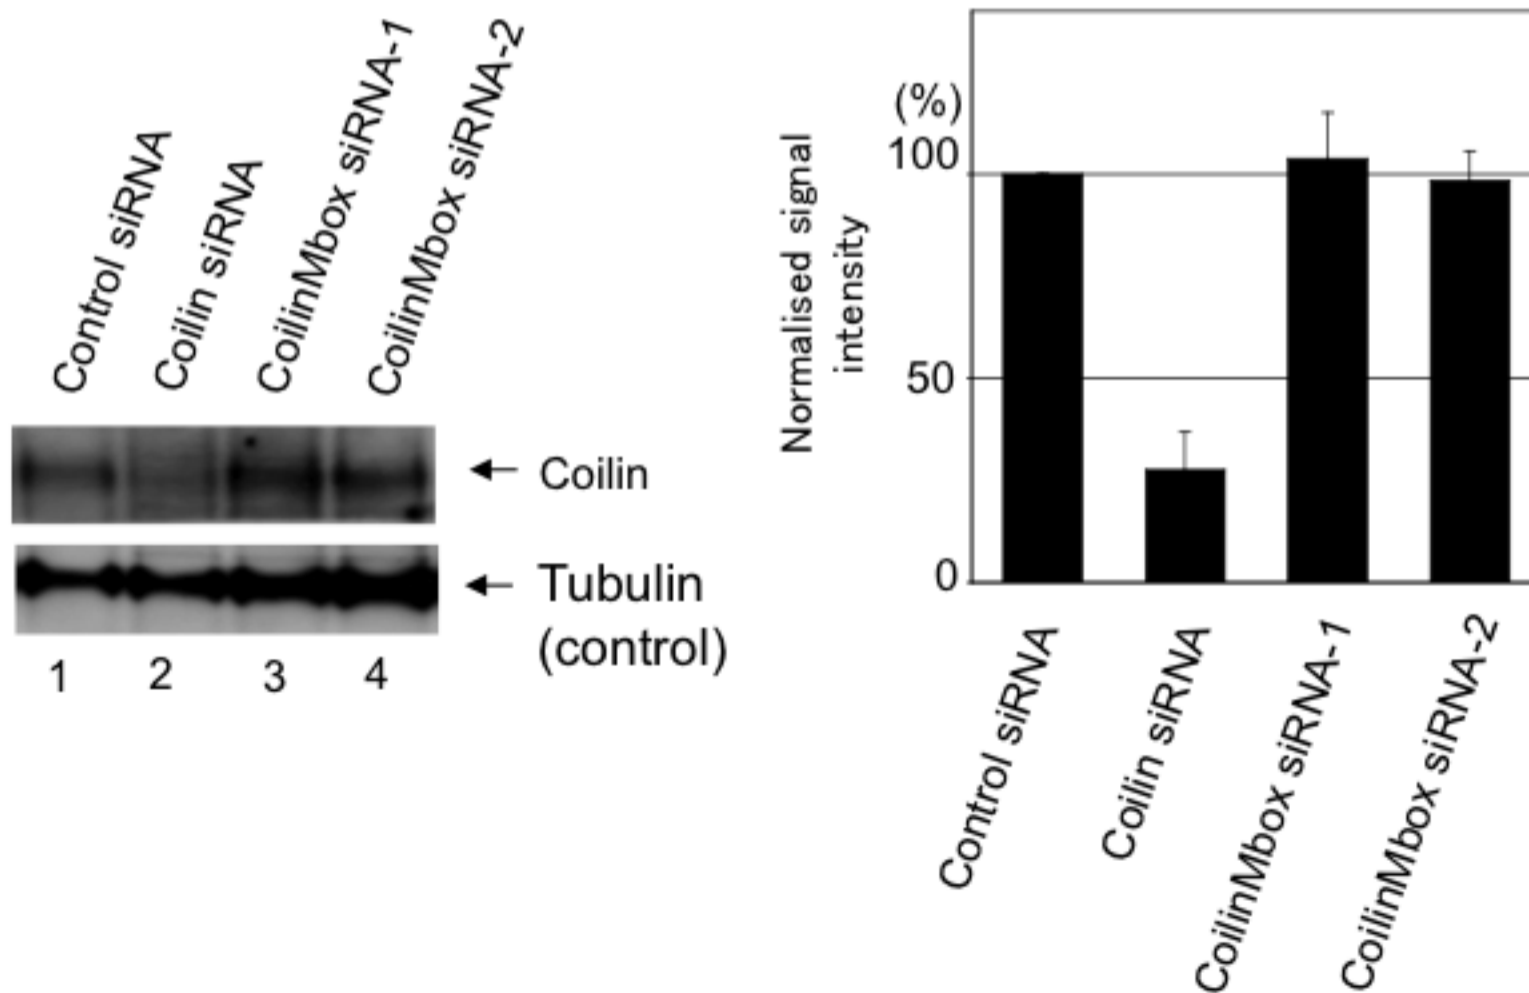

**Supplementary Table 1A: List of small nucleolar RNAs identified from the unamplified cDNA library**

| <b>Description</b> | <b>Group</b> | <b>Type</b> | <b>Accession No.<sup>a</sup></b> | <b>Chrom.</b> | <b>Feature</b>                                                 | <b>Previous status</b>                                    |
|--------------------|--------------|-------------|----------------------------------|---------------|----------------------------------------------------------------|-----------------------------------------------------------|
| AIL-1              | snoRNA       | box C/D     | NA                               | 9p13.3        | Intron (ubiquitin associated protein 2)                        | Previously unknown                                        |
| HBII-234           | snoRNA       | box C/D     | NR_003058                        | 2q33.1        | Intron (nucleolar protein NOP5/NOP58)                          | Predicted by homology to mouse MBII-234 [1]               |
| HBII-429           | snoRNA       | box C/D     | NR_002435                        | 6q23.2        | Intron (ribosomal protein S12) not U101                        | Predicted by homology to mouse MBII-429 [1]               |
| HBII-296B          | snoRNA       | box C/D     | NR_003073                        | 17p13.3       | Intron (hypothetical protein FLJ10534)                         | Predicted by homology to mouse MBII-296 [1]               |
| HBII-180C          | snoRNA       | box C/D     | NR_003069                        | 19q13.33      | Intron in multidrug resistance-related protein                 | Predicted by homology to mouse MBII-180C and MBII-211 [1] |
| U106               | snoRNA       | box C/D     | AY349607                         | 20q13.13      | Intron (similar to RPE-spondin)                                | Predicted by homology to rat U106 [2]                     |
| HBII-135           | snoRNA       | box C/D     | NR_003054                        | 17p11.2       | Intron (hypothetical protein MGC40157) not U49                 | Experimentally identified in human [3]                    |
| HBII-202           | snoRNA       | box C/D     | NR_002450                        | 16q24.3       | Intron (ribosomal protein L13)                                 | Predicted by homology to mouse MBII-202 [1]               |
| AIL-8              | snoRNA       | box C/D     | NA                               | 20p13         | Intron (small nuclear ribonucleoprotein polypeptides B and B1) | Previously unknown                                        |
| U101               | snoRNA       | box C/D     | NR_002434                        | 6q23.2        | Intron (ribosomal protein S12)                                 | Predicted by homology to rat U101 [2]                     |
| U104               | snoRNA       | box C/D     | AY349605                         | 17q23.3       | Intron (hmm27142)                                              | Predicted by homology to rat U104 [2]                     |
| U13                | snoRNA       | box C/D     | NR_003041                        | 3p21.31       | Intron (kinesin family member 9)                               | Previously experimentally identified in human [4]         |
| U14A               | snoRNA       | box C/D     | NR_000022                        | 11q24.1       | Intron (heat shock 70kDa protein 8)                            | Previously experimentally identified in human [5]         |
| U15b               | snoRNA       | box C/D     | NR_000025                        | 11q13.3-5     | Intron (ribosomal protein S3)                                  | Paralogue of experimentally identified U15A [6]           |
| U18A               | snoRNA       | box C/D     | NR_002441                        | 15q22         | Intron (ribosomal protein L4)                                  | Previously experimentally identified in human [5]         |
| U20                | snoRNA       | box C/D     | NR_002908                        | 2q12          | Intron (nucleolin)                                             | Previously experimentally identified in human [7]         |
| U22                | snoRNA       | box C/D     | NR_000008                        | 11q13         | Intron (UHG)                                                   | Experimentally identified in human [3]                    |
| U24                | snoRNA       | box C/D     | NR_002447                        | 9q34          | Intron (ribosomal protein L7a)                                 | Previously experimentally identified in human [8]         |
| U3                 | snoRNA       | box C/D     | M14061                           | 17p11.2       | Intron (GRB2-related adaptor protein-like) or close 5' region  | Previously experimentally identified in human [4]         |
| U32A               | snoRNA       | box C/D     | NR_000021                        | 19q13.3       | Intron (ribosomal protein L13a)                                | Previously experimentally identified in human [9]         |
| U33                | snoRNA       | box C/D     | NR_000020                        | 19q13.3       | Intron (ribosomal protein L13a)                                | Previously experimentally identified in human [9]         |
| U35A               | snoRNA       | box C/D     | NR_000018                        | 19q13.3       | Intron (ribosomal protein L13a)                                | Previously experimentally identified in human [9]         |
| U36b               | snoRNA       | box C/D     | NR_000017                        | 9q34          | Intron (ribosomal protein L7a)                                 | Previously experimentally identified in human [9]         |
| U41                | snoRNA       | box C/D     | NR_002751                        | 19p13.13      | Intron (transportin 2 (importin 3, karyopherin beta 2b))       | Previously experimentally identified in human [5]         |
| U42A               | snoRNA       | box C/D     | NR_000014                        | 17q11         | Intron (ribosomal protein L23a)                                | Previously experimentally identified in human [5]         |
| U44                | snoRNA       | box C/D     | NR_002750                        | 1q25.1        | Intron (gas5) or hmm10502                                      | Previously experimentally identified in human [5]         |
| U47                | snoRNA       | box C/D     | NR_002746                        | 1q25.1        | Intron (gas5) or hmm10502                                      | Previously experimentally identified in human [5]         |
| U48                | snoRNA       | box C/D     | NR_002745                        | 6p21.3        | Intron (chromosome 6 open reading frame 48) close to HSP70a1b  | Previously experimentally identified in human [5]         |
| U49A               | snoRNA       | box C/D     | NR_002744                        | 17p11.2       | Intron (hypothetical protein MGC40157) not AW3                 | Previously experimentally identified in human [5]         |
| U50B               | snoRNA       | box C/D     | NR_003044                        | 6q14.3        | close to LOC441164                                             | Predicted paralogue of experimentally identified U50A [5] |

|             |        |                       |                   |          |                                                                                    |                                                    |
|-------------|--------|-----------------------|-------------------|----------|------------------------------------------------------------------------------------|----------------------------------------------------|
|             |        |                       |                   |          |                                                                                    | experimentally identified U50 [5]                  |
| U51         | snoRNA | box C/D               | NR_002589         | 2q33-34  | Intron (eukaryotic translation elongation factor 1 beta 2)                         | Previously experimentally identified in human [5]  |
| U54         | snoRNA | box C/D               | NR_002437         | 8q12     | Intron (ribosomal protein S20)                                                     | Previously experimentally identified in human [5]  |
| U57         | snoRNA | box C/D               | NR_002738         | 20p13    | Intron (nucleolar protein 5A (56kDa with KKE/D repeat))                            | Previously experimentally identified in human [5]  |
| U58A        | snoRNA | box C/D               | NR_002571         | 18q21    | Intron (ribosomal protein L17)                                                     | Previously experimentally identified in human [5]  |
| U59A        | snoRNA | box C/D               | NR_002737         | 12q13.13 | Intron (ATP synthase, H+ transporting, mitochondrial F1 complex, beta)             | Previously experimentally identified in human [5]  |
| U64         | snoRNA | box H/ACA             | NR_002326         | 16p13.3  | Intron (ribosomal protein S2)                                                      | Previously experimentally identified in human [10] |
| U73a        | snoRNA | box C/D               | NR_000007         | 4q31.2-3 | Intron (ribosomal protein S3A)                                                     | Previously experimentally identified in human [11] |
| U76         | snoRNA | box C/D               | AF141346          | 1q25.1   | Intron (gas5) or hmm10502                                                          | Predicted by homology to mouse U79 [12]            |
| U77         | snoRNA | box C/D               | AF141346          | 1q25.1   | Intron (gas5) or hmm10502                                                          | Predicted by homology to mouse U79 [12]            |
| U78         | snoRNA | box C/D               | AF141346          | 1q25.1   | Intron (gas5) or hmm10502                                                          | Predicted by homology to mouse U79 [12]            |
| U79         | snoRNA | box C/D               | AF141346          | 1q25.1   | Intron (gas5) or hmm10502                                                          | Predicted by homology to mouse U79 [12]            |
| U83         | snoRNA | box C/D               | AJ243200          | 6p21.3   | Intron (HLA-B associated transcript 1)                                             | Previously experimentally identified in human [13] |
| U83a        | snoRNA | box C/D               | NR_000027         | 22q13    | Intron (ribosomal protein L3)                                                      | Previously experimentally identified in human [14] |
| U84         | snoRNA | box C/D               | NR_003065         | 6p21.3   | Intron (HLA-B associated transcript 1)                                             | Previously experimentally identified in human [13] |
| U87         | snoRNA | box C/D and box H/ACA | NR_003008         | 8q13     | close to hmm36010                                                                  | Previously experimentally identified in human [15] |
| U95         | snoRNA | box C/D               | NR_002591         | 5q35.3   | Intron (guanine nucleotide binding protein (G protein), beta polypeptide 2-like 1) | Predicted by homology to rat U95 [2]               |
| Z15(U80)    | snoRNA | box C/D               | AJ224022          | 1q25.1   | Intron (gas5) or hmm10502                                                          | Previously experimentally identified in human [12] |
| Z19(U75)    | snoRNA | box C/D               | AF141346          | 1q25.1   | Intron (gas5) or hmm10502                                                          | Predicted by homology to mouse U75 [12]            |
| Z23(U81)    | snoRNA | box C/D               | AJ224028          | 1q25.1   | Intron (gas5) or hmm10502                                                          | Predicted by homology to mouse U81 [12]            |
| Z39 homolog | snoRNA | box C/D               | AJ240057 (mouse)  | 5q14     | Intron (cytochrome c oxidase subunit VIIC)                                         | Previously unknown in human                        |
| Z40 homolog | snoRNA | box C/D               | AJ240059 (rattus) | 11q21    | Intron (hypothetical protein MGC5306)                                              | Previously unknown in human                        |
| U1          | snRNA  | box C/D               | V00591            | 1p36.13  | close to hypothetical gene supported by BC033316 (3' downstream)                   | Previously experimentally identified in human [16] |
| U60         | snRNA  | box C/D               | NR_002736         | 16p13.3  | between TNF receptor-associated factor 7 & member RAS oncogene family              | Previously experimentally identified in human [5]  |
| ACA62       | snoRNA | box H/ACA             | NR_002995         | 17q23.3  | close to uncharacterized hypothalamus protein HT008 or EXON of hmm27142            | Computationally predicted [17]                     |
| U19-2       | snoRNA | box H/ACA             | NR_002988         | 10q11.23 | Intron (hmm290)                                                                    | Previously experimentally identified in human [18] |
| ACA10       | snoRNA | box H/ACA             | NR_002327         | 16p13.3  | Intron (ribosomal protein S2)                                                      | Previously experimentally identified in human [19] |
| ACA14A      | snoRNA | box H/ACA             | NR_002955         | 1q42.3   | Intron (similar to Translocase of outer mitochondrial membrane 20 homolog)         | Previously experimentally identified in human [19] |
| ACA14b      | snoRNA | box H/ACA             | NR_002956         | 1q42.3   | Intron (similar to Translocase of outer mitochondrial membrane 20 homolog)         | Previously experimentally identified in human [19] |
| ACA16/U98   | snoRNA | box H/ACA             | NR_003035         | 1P35.3   | close to ACA44, ACA61 (PNAS-123, 3'non-coding)                                     | Previously experimentally identified in human [19] |
| ACA18       | snoRNA | box H/ACA             | NR_002959         | 11q21    | Intron (hypothetical protein MGC5306)                                              | Previously experimentally identified in human [19] |
| ACA19       | snoRNA | box H/ACA             | NR_002917         | 10q26    | Intron (eukaryotic translation initiation factor 3, subunit 10 theta, 150/170kDa)  | Previously experimentally identified in human [19] |
| ACA20       | snoRNA | box H/ACA             | NR_002960         | 6q25-27  | Intron (t-complex 1)                                                               | Previously experimentally identified in human [19] |

|         |        |              |           |          |                                                                     |                                                    |
|---------|--------|--------------|-----------|----------|---------------------------------------------------------------------|----------------------------------------------------|
| ACA21   | snoRNA | box<br>H/ACA | NR_002576 | 17q      | Intron (ribosomal protein L23)                                      | Previously experimentally identified in human [19] |
| ACA22   | snoRNA | box<br>H/ACA | NR_002961 | 7q11.21  | Intron (similar to chaperonin containing TCP1, subunit 6A (zeta 1)) | Previously experimentally identified in human [19] |
| ACA23   | snoRNA | box<br>H/ACA | NR_002962 | 11p15.4  | Intron (importin 7)                                                 | Previously experimentally identified in human [19] |
| ACA24   | snoRNA | box<br>H/ACA | NR_002963 | 4q28.1   | close to protease, serine, 12 and unknown gene                      | Previously experimentally identified in human [19] |
| ACA28   | snoRNA | box<br>H/ACA | NR_002964 | 14q32.32 | Intron (eukaryotic translation initiation factor 5)                 | Previously experimentally identified in human [19] |
| ACA3    | snoRNA | box<br>H/ACA | NR_002580 | 11p15    | Intron (ribosomal protein L27a)                                     | Previously experimentally identified in human [19] |
| ACA31   | snoRNA | box<br>H/ACA | NR_002967 | 13q12-14 | Intron (tumor protein, translationally-controlled 1)                | Previously experimentally identified in human [19] |
| ACA33   | snoRNA | box<br>H/ACA | NR_002436 | 6q23.2   | Intron (ribosomal protein S12) not U101 not marco                   | Previously experimentally identified in human [19] |
| ACA34   | snoRNA | box<br>H/ACA | NR_002968 | 12q13.11 | Intron (hypothetical protein FLJ20436)                              | Previously experimentally identified in human [19] |
| ACA40   | snoRNA | box<br>H/ACA | NR_002973 | 11q21    | Intron (hypothetical protein MGC5306)                               | Previously experimentally identified in human [19] |
| ACA44   | snoRNA | box<br>H/ACA | NR_002976 | 1P35.3   | close to ACA16, ACA61 (PNAS-123, not intron)                        | Previously experimentally identified in human [19] |
| ACA46   | snoRNA | box<br>H/ACA | NR_002978 | 12q24.33 | Intron (E1A binding protein p400)                                   | Previously experimentally identified in human [19] |
| ACA48   | snoRNA | box<br>H/ACA | NR_002918 | 17p13    | Intron (eukaryotic translation initiation factor 4A, isoform 1)     | Previously experimentally identified in human [19] |
| ACA49   | snoRNA | box<br>H/ACA | NR_002979 | 12q24.33 | Intron (E1A binding protein p400)                                   | Previously experimentally identified in human [19] |
| ACA54   | snoRNA | box<br>H/ACA | NR_002982 | 11p15.5  | Intron (nucleosome assembly protein 1-like 4)                       | Previously experimentally identified in human [19] |
| ACA6    | snoRNA | box<br>H/ACA | NR_002325 | 3P21.3   | Intron (laminin receptor 1 (ribosomal protein SA, 67kDa))           | Previously experimentally identified in human [19] |
| ACA61   | snoRNA | box<br>H/ACA | NR_002987 | 1P35.3   | close to ACA16, ACA44 (PNAS-123, not intron)                        | Previously experimentally identified in human [19] |
| ACA7    | snoRNA | box<br>H/ACA | NR_002582 | 3p25-24  | Intron (ribosomal protein L32)                                      | Previously experimentally identified in human [19] |
| ACA8    | snoRNA | box<br>H/ACA | NR_002920 | 11q21    | Intron (hypothetical protein MGC5306)                               | Previously experimentally identified in human [19] |
| ACA9    | snoRNA | box<br>H/ACA | NR_002952 | 7p13     | close to hmm34350                                                   | Previously experimentally identified in human [19] |
| E1(U17) | snoRNA | box<br>H/ACA | NR_002907 | 1p36.1   | Intron (chromosome condensation 1)                                  | Previously experimentally identified in human [20] |
| E1b     | snoRNA | box<br>H/ACA | U12210    | 1p36.1   | Intron (chromosome condensation 1)                                  | Previously experimentally identified in human [21] |
| E3      | snoRNA | box<br>H/ACA | NR_002586 | 3q28     | Intron (eukaryotic translation initiation factor 4A, isoform 2)     | Previously experimentally identified in human [20] |
| AIL-2   | snoRNA | box<br>H/ACA | NA        | 17q24.2  | Nucleolar protein 11 Intron (DKFZP586L0724 protein)                 | Previously unknown                                 |
| AIL-5   | snoRNA | box<br>H/ACA | NA        | 5q31.1   | Intron (SEC24 related gene family, member A)                        | Previously unknown                                 |
| AIL-7   | snoRNA | box<br>H/ACA | NA        | 5q21.3   | Intron (EFNA5) ephrin-A5                                            | Previously unknown                                 |
| U19     | snoRNA | box<br>H/ACA | NR_002915 | 5q31.2   | Intron (hmm33082) close to matrin 3                                 | Previously experimentally identified in human [22] |
| U67     | snoRNA | box<br>H/ACA | NR_002912 | 17P13    | Intron (eukaryotic translation initiation factor 4A, isoform 1)     | Previously experimentally identified in human [10] |
| U68     | snoRNA | box<br>H/ACA | NR_000012 | 19p13    | Intron (ribosomal protein L18a)                                     | Previously experimentally identified in human [10] |
| U70     | snoRNA | box<br>H/ACA | NR_000011 | Xq28     | Intron (ribosomal protein L10)                                      | Previously experimentally identified in human [10] |
| U71b    | snoRNA | box<br>H/ACA | NR_002910 | 20q11.23 | Intron (hypothetical LOC388796)                                     | Previously experimentally identified in human [10] |
| U72     | snoRNA | box<br>H/ACA | NR_002581 | 8q22     | Intron (ribosomal protein L30)                                      | Previously experimentally identified in human [10] |
| U99     | snoRNA | box<br>H/ACA | AY349600  | 11q12.3  | Intron (hypothetical protein MGC2477)                               | Previously experimentally identified in human [2]  |
| U2      | snRNA  | box<br>H/ACA | K03023    | 17q21.31 | (hmm6552, 3'region) close to U2 small nuclear pseudogene 2          | Previously experimentally identified in human [23] |

|        |        |           |        |         |                                                       |                                                    |
|--------|--------|-----------|--------|---------|-------------------------------------------------------|----------------------------------------------------|
| AIL-3  | snoRNA | box H/ACA | NA     | 1p36.13 | Intron (KIAA0476)                                     | Previously unknown                                 |
| MRP/Th | snoRNA | NA        | X51867 | 9p13.3  | close to hypothetical protein MGC31967 (5' upstreame) | Previously experimentally identified in human [24] |
| USE    | snRNA  | NA        | M77839 | 1p36.22 | close to hypothetical protein MGC33867                | Previously experimentally identified in human [25] |

<sup>a</sup>When available, Refseq identifiers were used. Otherwise, other GenBank or EnsEMBL accession numbers were chosen.

### Supplementary Table 1B: List of small nucleolar RNAs identified from the amplified cDNA library

| Description | Group    | Type      | Accession No. <sup>a</sup> | Chromosome | Feature                                                         | Previous status                                             |
|-------------|----------|-----------|----------------------------|------------|-----------------------------------------------------------------|-------------------------------------------------------------|
| ACA16/U98   | snoRNA   | box H/ACA | NR_003035                  | 1P35.3     | close to ACA44, ACA61 (PNAS-123, 3'non-coding)                  | Previously experimentally identified in human [19]          |
| ACA24       | snoRNA   | box H/ACA | NR_002963                  | 4q28.1     | close to protease, serine, 12 and unknown gene                  | Previously experimentally identified in human [19]          |
| ACA27       | snoRNA   | box H/ACA | NR_002575                  | 13q12.2    | Intron (ribosomal protein L21)                                  | Previously experimentally identified in human [19]          |
| ACA28       | snoRNA   | box H/ACA | NR_002964                  | 14q32.32   | Intron (eukaryotic translation initiation factor 5)             | Previously experimentally identified in human [19]          |
| ACA2a       | snoRNA   | box H/ACA | NR_002950                  | 12q13.11   | Intron (hypothetical protein FLJ20436)                          | Previously experimentally identified in human [19]          |
| ACA34       | snoRNA   | box H/ACA | NR_002968                  | 12q13.11   | Intron (hypothetical protein FLJ20436)                          | Previously experimentally identified in human [19]          |
| ACA50       | snoRNA   | box H/ACA | NR_002980                  | 16q21      | Intron (CNOT1)                                                  | Previously experimentally identified in human [19]          |
| ACA7        | snoRNA   | box H/ACA | NR_002582                  | 3p25-24    | Intron (ribosomal protein L32)                                  | Previously experimentally identified in human [19]          |
| ACA8        | snoRNA   | box H/ACA | NR_002920                  | 11q21      | Intron (hypothetical protein MGC5306)                           | Previously experimentally identified in human [19]          |
| ACA9        | snoRNA   | box H/ACA | NR_002952                  | 7p13       | close to hmm34350                                               | Previously experimentally identified in human [19]          |
| AIL-4       | snoRNA   | box H/ACA | NA                         | 1p36.11    | Intron (hmm28229)                                               | Previously unknown                                          |
| HBII-234    | snoRNA   | box C/D   | NR_003058                  | 2q33.1     | Intron (nucleolar protein NOP5/NOP58)                           | Predicted by homology to mouse MBII-234 [1]                 |
| E1(U17)     | snoRNA   | box H/ACA | NR_002907                  | 1p36.1     | Intron (chromosome condensation 1)                              | Previously experimentally identified in human [20]          |
| E2          | snoRNA   | box H/ACA | NR_002324                  | 3p22.2     | Intron (ribosomal protein SA)                                   | Previously experimentally identified in human [20]          |
| E3          | snoRNA   | box H/ACA | NR_002586                  | 3q28       | Intron (eukaryotic translation initiation factor 4A, isoform 2) | Previously experimentally identified in human [20]          |
| HBII-85     | snoRNA   | box C/D   | NR_003316                  | 15q11.2    | Intron (hmm4244)                                                | Previously experimentally identified in human [26]          |
| HBII-429    | snoRNA   | box C/D   | NR_002435                  | 6q23.2     | Intron (ribosomal protein S12) not U101                         | Predicted by homology to mouse MBII-429 [1]                 |
| hsa-mir-21  | microRNA |           | NT_010783                  | 17q23.1    |                                                                 | Previously experimentally identified in human [27]          |
| ACA63       | snoRNA   | box H/ACA | NR_003019                  | 22q11.21   | Intron (RAN binding protein 1)                                  | Computationally predicted and experimentally validated [17] |
| HBII-296A   | snoRNA   | box C/D   | NR_003072                  | 17p13.3    | Intron (hypothetical protein FLJ10534)                          | Predicted by homology to mouse MBII-296 [1]                 |
| HBII-55     | snoRNA   | box C/D   | NR_003078                  | 20p13      | Intron (nucleolar protein 5A (56kDa with KKE/D repeat))         | Predicted by homology to mouse MBII-55 [1]                  |
| HBII-180C   | snoRNA   | box C/D   | NR_003069                  | 19q13.33   | Intron in multidrug resistance-related protein                  | Predicted by homology to mouse MBII-180C and MBII-211 [1]   |
| U105        | snoRNA   | box C/D   | AY349606                   | 19p13      | Intron (peter pan homolog (Drosophila))                         | Predicted by homology to rat U105 [2]                       |
| U106        | snoRNA   | box C/D   | AY349607                   | 20q13.13   | Intron (similar to RPE-spondin)                                 | Predicted by homology to rat U106 [2]                       |
| U14A        | snoRNA   | box C/D   | NR_000022                  | 11q24.1    | Intron (heat shock 70kDa protein 8)                             | Previously experimentally identified in human [5]           |
| U18A        | snoRNA   | box C/D   | NR_002441                  | 15q22      | Intron (ribosomal protein L4)                                   | Previously experimentally identified in human [5]           |

|          |        |           |           |            |                                                                        |                                                    |
|----------|--------|-----------|-----------|------------|------------------------------------------------------------------------|----------------------------------------------------|
| U21      | snoRNA | box C/D   | NR_000006 | 1p22.1     | Intron (ribosomal protein L5 )                                         | Previously experimentally identified in human [28] |
| U34      | snoRNA | box C/D   | NR_000019 | 19q13.3    | Intron (ribosomal protein L13a)                                        | Previously experimentally identified in human [9]  |
| U36c     | snoRNA | box C/D   | NR_000016 | 9q34       | Intron (ribosomal protein L7a)                                         | Previously experimentally identified in human [9]  |
| U38b     | snoRNA | box C/D   | NR_001457 | 1p34.1-p32 | Intron (ribosomal protein S8 )                                         | Previously experimentally identified in human [9]  |
| U42A     | snoRNA | box C/D   | NR_000014 | 17q11      | Intron (ribosomal protein L23a)                                        | Previously experimentally identified in human [5]  |
| U44      | snoRNA | box C/D   | NR_002750 | 1q25.1     | Intron (gas5) or hmm10502                                              | Previously experimentally identified in human [5]  |
| U49A     | snoRNA | box C/D   | NR_002744 | 17p11.2    | Intron (hypothetical protein MGC40157) not AW3                         | Previously experimentally identified in human [5]  |
| U50      | snoRNA | box C/D   | NR_002743 | 6q14.3     | Inside a cluster of ESTs                                               | Previously experimentally identified in human [5]  |
| U52      | snoRNA | box C/D   | NR_002742 | 6p21.3     | Intron (chromosome 6 open reading frame 48)                            | Previously experimentally identified in human [5]  |
| U56      | snoRNA | box C/D   | NR_002739 | 20p13      | Intron (nucleolar protein 5A (56kDa with KKE/D repeat))                | Previously experimentally identified in human [5]  |
| U59A     | snoRNA | box C/D   | NR_002737 | 12q13.13   | Intron (ATP synthase, H+ transporting, mitochondrial F1 complex, beta) | Previously experimentally identified in human [5]  |
| U60      | snoRNA | box C/D   | NR_002736 | 16p13.3    | 3' down stream of CASK interacting protein 1                           | Previously experimentally identified in human [5]  |
| U64      | snoRNA | box H/ACA | NR_002326 | 16p13.3    | Intron (ribosomal protein S2)                                          | Previously experimentally identified in human [10] |
| U67      | snoRNA | box H/ACA | NR_002912 | 17P13      | Intron (eukaryotic translation initiation factor 4A, isoform 1)        | Previously experimentally identified in human [10] |
| U68      | snoRNA | box H/ACA | NR_000012 | 19p13      | Intron (ribosomal protein L18a)                                        | Previously experimentally identified in human [10] |
| U70      | snoRNA | box H/ACA | NR_000011 | Xq28       | Intron (ribosomal protein L10)                                         | Previously experimentally identified in human [10] |
| U72      | snoRNA | box H/ACA | NR_002581 | 8q22       | Intron (ribosomal protein L30)                                         | Previously experimentally identified in human [10] |
| U95      | snoRNA | box C/D   | NR_002591 | 5q35.3     | Intron (guanine nucleotide binding protein (G protein))                | Predicted by homology to rat U95 [2]               |
| mgU6-77  | snoRNA | box C/D   | NR_002604 | 17p13      | Intron (eukaryotic translation initiation factor 4A, isoform 1)        | Predicted by homology to mouse mgU6-77 [29]        |
| Z15(U80) | snoRNA | box C/D   | AJ224022  | 1q25.1     | Intron (gas5) or hmm10502                                              | Previously experimentally identified in human [12] |
| Z18(U74) | snoRNA | box C/D   | AJ224028  | 1q25.1     | Intron (gas5) or hmm10502                                              | Predicted by homology to mouse U74 [12]            |
| Z20(U76) | snoRNA | box C/D   | AJ224022  | 1q25.1     | Intron (gas5) or hmm10502                                              | Predicted by homology to mouse U76 [12]            |
| Z23(U81) | snoRNA | box C/D   | AJ224028  | 1q25.1     | Intron (gas5) or hmm10502                                              | Predicted by homology to mouse U81 [12]            |

<sup>a</sup>When available, Refseq identifiers were used. Otherwise, other GenBank or EnsEMBL accession numbers were chosen.

1. Huttenhofer, A., Kiefmann, M., Meier-Ewert, S., O'Brien, J., Lehrach, H., Bachellerie, J.P., and Brosius, J. (2001). RNomics: an experimental approach that identifies 201 candidates for novel, small, non-messenger RNAs in mouse. *Embo J* 20, 2943-2953.
2. Vitali, P., Royo, H., Seitz, H., Bachellerie, J.P., Huttenhofer, A., and Cavaille, J. (2003). Identification of 13 novel human modification guide RNAs. *Nucleic Acids Res* 31, 6543-6551.
3. Tycowski, K.T., Shu, M.D., and Steitz, J.A. (1994). Requirement for intron-encoded U22 small nucleolar RNA in 18S ribosomal RNA maturation. *Science* 266, 1558-1561.
4. Tyc, K., and Steitz, J.A. (1989). U3, U8 and U13 comprise a new

- class of mammalian snRNPs localized in the cell nucleolus. *Embo J* 8, 3113-3119.
5. Kiss-Laszlo, Z., Henry, Y., Bachellerie, J.P., Caizergues-Ferrer, M., and Kiss, T. (1996). Site-specific ribose methylation of preribosomal RNA: a novel function for small nucleolar RNAs. *Cell* 85, 1077-1088.
  6. Tycowski, K.T., Shu, M.D., and Steitz, J.A. (1993). A small nucleolar RNA is processed from an intron of the human gene encoding ribosomal protein S3. *Genes Dev* 7, 1176-1190.
  7. Nicoloso, M., Caizergues-Ferrer, M., Michot, B., Azum, M.C., and Bachellerie, J.P. (1994). U20, a novel small nucleolar RNA, is encoded in an intron of the nucleolin gene in mammals. *Mol Cell Biol* 14, 5766-5776.
  8. Qu, L.H., Henry, Y., Nicoloso, M., Michot, B., Azum, M.C., Renalier, M.H., Caizergues-Ferrer, M., and Bachellerie, J.P. (1995). U24, a novel intron-encoded small nucleolar RNA with two 12 nt long, phylogenetically conserved complementarities to 28S rRNA. *Nucleic Acids Res* 23, 2669-2676.
  9. Nicoloso, M., Qu, L.H., Michot, B., and Bachellerie, J.P. (1996). Intron-encoded, antisense small nucleolar RNAs: the characterization of nine novel species points to their direct role as guides for the 2'-O-ribose methylation of rRNAs. *J Mol Biol* 260, 178-195.
  10. Ganot, P., Caizergues-Ferrer, M., and Kiss, T. (1997). The family of box ACA small nucleolar RNAs is defined by an evolutionarily conserved secondary structure and ubiquitous sequence elements essential for RNA accumulation. *Genes Dev* 11, 941-956.
  11. Rebane, A., Tamme, R., Laan, M., Pata, I., and Metspalu, A. (1998). A novel snoRNA (U73) is encoded within the introns of the human and mouse ribosomal protein S3a genes. *Gene* 210, 255-263.
  12. Smith, C.M., and Steitz, J.A. (1998). Classification of gas5 as a multi-small-nucleolar-RNA (snoRNA) host gene and a member of the 5'-terminal oligopyrimidine gene family reveals common features of snoRNA host genes. *Mol Cell Biol* 18, 6897-6909.
  13. Jady, B.E., and Kiss, T. (2000). Characterisation of the U83 and U84 small nucleolar RNAs: two novel 2'-O-ribose methylation guide RNAs that lack complementarities to ribosomal RNAs. *Nucleic Acids Res* 28, 1348-1354.
  14. Duga, S., Asselta, R., Malcovati, M., Tenchini, M.L., Ronchi, S., and Simonic, T. (2000). The intron-containing L3 ribosomal protein gene (RPL3): sequence analysis and identification of U43 and of

- two novel intronic small nucleolar RNAs. *Biochim Biophys Acta* *1490*, 225-236.
15. Darzacq, X., Jady, B.E., Verheggen, C., Kiss, A.M., Bertrand, E., and Kiss, T. (2002). Cajal body-specific small nuclear RNAs: a novel class of 2'-O-methylation and pseudouridylation guide RNAs. *Embo J* *21*, 2746-2756.
  16. Murphy, J.T., Burgess, R.R., Dahlberg, J.E., and Lund, E. (1982). Transcription of a gene for human U1 small nuclear RNA. *Cell* *29*, 265-274.
  17. Schattner, P., Barberan-Soler, S., and Lowe, T.M. (2006). A computational screen for mammalian pseudouridylation guide H/ACA RNAs. *Rna* *12*, 15-25.
  18. Gu, A.D., Zhou, H., Yu, C.H., and Qu, L.H. (2005). A novel experimental approach for systematic identification of box H/ACA snoRNAs from eukaryotes. *Nucleic Acids Res* *33*, e194.
  19. Kiss, A.M., Jady, B.E., Bertrand, E., and Kiss, T. (2004). Human box H/ACA pseudouridylation guide RNA machinery. *Mol Cell Biol* *24*, 5797-5807.
  20. Ruff, E.A., Rimoldi, O.J., Raghu, B., and Eliceiri, G.L. (1993). Three small nucleolar RNAs of unique nucleotide sequences. *Proc Natl Acad Sci U S A* *90*, 635-638.
  21. Selvamurugan, N., Nag, M.K., and Eliceiri, G.L. (1995). Intron-encoded small nucleolar RNAs: new RNA sequence variants and genomic loci. *Biochim Biophys Acta* *1260*, 230-234.
  22. Kiss, T., Bortolin, M.L., and Filipowicz, W. (1996). Characterization of the intron-encoded U19 RNA, a new mammalian small nucleolar RNA that is not associated with fibrillarin. *Mol Cell Biol* *16*, 1391-1400.
  23. Van Arsdell, S.W., and Weiner, A.M. (1984). Human genes for U2 small nuclear RNA are tandemly repeated. *Mol Cell Biol* *4*, 492-499.
  24. Topper, J.N., and Clayton, D.A. (1990). Characterization of human MRP/Th RNA and its nuclear gene: full length MRP/Th RNA is an active endoribonuclease when assembled as an RNP. *Nucleic Acids Res* *18*, 793-799.
  25. Sontheimer, E.J., and Steitz, J.A. (1992). Three novel functional variants of human U5 small nuclear RNA. *Mol Cell Biol* *12*, 734-746.
  26. Cavaille, J., Seitz, H., Paulsen, M., Ferguson-Smith, A.C., and Bachellerie, J.P. (2002). Identification of tandemly-repeated C/D snoRNA genes at the imprinted human 14q32 domain reminiscent of those at the Prader-Willi/Angelman syndrome region. *Hum Mol Genet* *11*, 1527-1538.



27. Lagos-Quintana, M., Rauhut, R., Lendeckel, W., and Tuschl, T. (2001). Identification of novel genes coding for small expressed RNAs. *Science* 294, 853-858.
28. Qu, L.H., Nicoloso, M., Michot, B., Azum, M.C., Caizergues-Ferrer, M., Renalier, M.H., and Bachellerie, J.P. (1994). U21, a novel small nucleolar RNA with a 13 nt. complementarity to 28S rRNA, is encoded in an intron of ribosomal protein L5 gene in chicken and mammals. *Nucleic Acids Res* 22, 4073-4081.
29. Tycowski, K.T., You, Z.H., Graham, P.J., and Steitz, J.A. (1998). Modification of U6 spliceosomal RNA is guided by other small RNAs. *Mol Cell* 2, 629-638.
